# Supplementary material
Source: publisher figshare collection journal article supplement (https://frontiersin.figshare.com/ndownloader/files/22026885)
Supplement: Supplementary file 1 [file 22026885]

Supplementary Data Sheet 1: Passport information and assignment to population when K=2, 3, 4 and 5 (IG is a unqiue accession identifier, SiteCode is unique ID for the collecting site).
IG	Country	PopulationType	SiteCode	Longitude	Latitude	Altitude	DOI	Taxon	grp2	grp3	grp4	grp5
40835	SYR	UM	SYR83-3::71	41.45	37.0667	454	10.18730/6V5BP	Triticum aestivum subsp. aestivum	1	1	3	4
40844	SYR	UM	SYR83-3::160	36.8806	35.35		10.18730/6V5FT	Triticum aestivum subsp. aestivum	1	1	3	4
40852	SYR	UM	SYR83-3::140	36.3306	35.2028		10.18730/6V5MZ	Triticum aestivum subsp. aestivum	1	1	3	4
40856	SYR	UM	SYR83-3::88	37.0558	36.5856		10.18730/6V5Q$	Triticum aestivum subsp. aestivum	1	1	3	4
40859	SYR	UM	SYR83-3::115	37.1708	36.6431		10.18730/6V5SU	Triticum aestivum subsp. aestivum	1	1	3	4
40863	SYR	UM	SYR83-3::194	38.9597	36.6944		10.18730/6V5W2	Triticum aestivum subsp. aestivum	1	1	3	4
40865	SYR	UM	SYR83-3::88	37.0558	36.5856		10.18730/6V5Y4	Triticum aestivum subsp. aestivum	1	1	3	4
41227	PAK	LA	PAK76-2:63	72.2167	36.3167	2330	10.18730/6VGF8	Triticum aestivum subsp. aestivum	2	3	4	2
41231	PAK	LA	PAK76-2:4	72.52	34.53	860	10.18730/6VGKC	Triticum aestivum subsp. aestivum	2	2	1	5
41232	PAK	LA	PAK76-2:9	72.48	34.53	830	10.18730/6VGMD	Triticum aestivum subsp. aestivum	2	3	4	2
41235	PAK	LA	PAK76-2:33	71.815	35.97	1690	10.18730/6VGQG	Triticum aestivum subsp. aestivum	2	3	4	2
41242	PAK	LA	PAK76-2:24	72.4667	34.9667	1120	10.18730/6VGYQ	Triticum aestivum subsp. aestivum	1	2	3	5
41243	PAK	LA	PAK76-2:24	72.4667	34.9667	1120	10.18730/6VGZR	Triticum aestivum subsp. aestivum	2	3	4	2
41244	PAK	LA	PAK76-2::10	71.9333	35.95	1700	10.18730/6VH0S	Triticum aestivum subsp. aestivum	2	3	4	2
41256	PAK	LA	PAK76-2:44	71.77	35.66	1480	10.18730/6VHC0	Triticum aestivum subsp. aestivum	2	3	4	2
41262	PAK	LA	PAK76-2::7	72.4	36.2697	2290	10.18730/6VHJ6	Triticum aestivum subsp. aestivum	2	3	4	2
41269	PAK	LA	PAK76-2::4	72.3333	36.2667	2270	10.18730/6VHSD	Triticum aestivum subsp. aestivum	2	3	4	2
41271	PAK	LA	PAK76-2::23	72.3681	36.35	2200	10.18730/6VHVF	Triticum aestivum subsp. aestivum	2	3	4	2
41288	PAK	LA	PAK76-2::78	72.36	36.35	2210	10.18730/6VJC*	Triticum aestivum subsp. aestivum	2	3	4	2
41291	PAK	LA	PAK76-2:75	72.4667	36.5531	2700	10.18730/6VJF=	Triticum aestivum subsp. aestivum	2	3	4	2
41293	PAK	LA	PAK76-2:76	72.5681	36.6333	2800	10.18730/6VJH0	Triticum aestivum subsp. aestivum	2	3	4	2
41294	PAK	LA	PAK76-2:76	72.5681	36.6333	2800	10.18730/6VJJ1	Triticum aestivum subsp. aestivum	2	3	4	2
41308	PAK	LA	PAK76-2:101	72.4833	36.1167	2800	10.18730/6VK0F	Triticum aestivum subsp. aestivum	2	3	4	2
41317	PAK	LA	PAK76-2:49	72.3164	36.2761	2270	10.18730/6VK9R	Triticum aestivum subsp. aestivum	2	2	1	5
41321	PAK	LA	PAK76-2:45	72.1	36.15	1920	10.18730/6VKDW	Triticum aestivum subsp. aestivum	2	3	4	2
41323	PAK	LA	PAK76-2::18	72.2167	36.3	2060	10.18730/6VKFY	Triticum aestivum subsp. aestivum	2	3	4	2
41325	PAK	LA	PAK76-2::72	72.3333	36.305	2200	10.18730/6VKH*	Triticum aestivum subsp. aestivum	2	2	1	5
41326	PAK	LA	PAK76-2::72	72.3333	36.305	2200	10.18730/6VKJ~	Triticum aestivum subsp. aestivum	2	3	4	2
41333	PAK	LA	PAK76-2:114	72.5667	36.3167	2400	10.18730/6VKS3	Triticum aestivum subsp. aestivum	2	3	4	2
41337	PAK	LA	PAK76-2:87	72.2139	36.3889	2650	10.18730/6VKX7	Triticum aestivum subsp. aestivum	2	2	1	5
41339	PAK	LA	PAK76-2::69	72.39	36.3539	2850	10.18730/6VKZ9	Triticum aestivum subsp. aestivum	2	3	4	2
41344	PAK	LA	PAK76-2:99	72.49	36.2	2500	10.18730/6VM4E	Triticum aestivum subsp. aestivum	2	2	1	5
41350	PAK	LA	PAK76-2:108	72.45	36.1	2700	10.18730/6VMAM	Triticum aestivum subsp. aestivum	2	2	4	2
41359	PAK	LA	PAK76-2::8	72.39	36.2667	2320	10.18730/6VMKX	Triticum aestivum subsp. aestivum	2	3	4	2
41360	PAK	LA	PAK76-2::8	72.39	36.2667	2320	10.18730/6VMMY	Triticum aestivum subsp. aestivum	2	3	4	2
41366	PAK	LA	PAK76-2::42	71.5	35.9894	2400	10.18730/6VMTU	Triticum aestivum subsp. aestivum	2	3	4	2
41368	PAK	LA	PAK76-2:137	71.5333	35.9833	2310	10.18730/6VMW1	Triticum aestivum subsp. aestivum	2	3	4	2
41372	PAK	LA	PAK76-2:112	72.5167	36.2833	2350	10.18730/6VN05	Triticum aestivum subsp. aestivum	2	3	4	2
41379	PAK	LA	PAK76-2:119	72.6833	36.4667	2470	10.18730/6VN7C	Triticum aestivum subsp. aestivum	2	3	4	2
41381	PAK	LA	PAK76-2:122	72.7667	36.5167	2600	10.18730/6VN9E	Triticum aestivum subsp. aestivum	2	3	4	2
41387	PAK	LA	PAK76-2:124	72.8167	36.5667	2600	10.18730/6VNFM	Triticum aestivum subsp. aestivum	1	2	1	5
41392	PAK	LA	PAK76-2:120	72.7	36.4833	2540	10.18730/6VNMS	Triticum aestivum subsp. aestivum	2	2	4	2
41395	PAK	LA	PAK76-2:117	72.6333	36.4	2430	10.18730/6VNQW	Triticum aestivum subsp. aestivum	2	2	1	5
41399	PAK	LA	PAK76-2:159	71.5333	34		10.18730/6VNV*	Triticum aestivum subsp. aestivum	2	3	4	2
41403	PAK	LA	PAK76-2:143	71.46	36.005	2630	10.18730/6VNZU	Triticum aestivum subsp. aestivum	2	3	4	2
41406	PAK	LA	PAK76-2::41	71.43	36.01	2920	10.18730/6VP22	Triticum aestivum subsp. aestivum	2	3	4	2
41409	PAK	LA	PAK76-2::39	71.55	35.99	2300	10.18730/6VP55	Triticum aestivum subsp. aestivum	2	3	4	2
41415	PAK	LA	PAK76-2:131	71.7667	36.0167	1850	10.18730/6VPBB	Triticum aestivum subsp. aestivum	2	3	4	2
41420	PAK	LA	PAK76-2:156	71.8333	36.0833	2800	10.18730/6VPGG	Triticum aestivum subsp. aestivum	2	3	4	2
41421	PAK	LA	PAK76-2:157	71.8333	36.1	3000	10.18730/6VPHH	Triticum aestivum subsp. aestivum	2	3	4	2
41423	PAK	LA	PAK76-2:157	71.8333	36.1	3000	10.18730/6VPKK	Triticum aestivum subsp. aestivum	2	3	4	2
41424	PAK	LA	PAK76-2:150	71.6717	36.1333	2400	10.18730/6VPMM	Triticum aestivum subsp. aestivum	2	3	4	2
41425	PAK	LA	PAK76-2:150	71.6717	36.1333	2400	10.18730/6VPNN	Triticum aestivum subsp. aestivum	2	3	4	2
41428	PAK	LA	PAK76-2:150	71.6717	36.1333	2400	10.18730/6VPRR	Triticum aestivum subsp. aestivum	1	1	3	4
41430	PAK	LA	PAK76-2:152	71.69	36.205	2600	10.18730/6VPTT	Triticum aestivum subsp. aestivum	2	3	4	2
41432	PAK	LA	PAK76-2:153	71.695	36.2433	2850	10.18730/6VPWW	Triticum aestivum subsp. aestivum	2	3	4	2
41435	PAK	LA	PAK76-2:155	71.8217	36.0667	2700	10.18730/6VPZZ	Triticum aestivum subsp. aestivum	2	3	4	2
41439	PAK	LA	PAK76-2:164	71.71	35.7119	1890	10.18730/6VQ3=	Triticum aestivum subsp. aestivum	2	3	4	2
41440	PAK	LA	PAK76-2:163	71.71	35.7167	1850	10.18730/6VQ4U	Triticum aestivum subsp. aestivum	2	3	4	2
41442	PAK	LA	PAK76-2::16	71.75	35.2		10.18730/6VQ61	Triticum aestivum subsp. aestivum	1	1	3	4
41444	PAK	LA	PAK76-2::25	72.2167	36.3167	2330	10.18730/6VQ83	Triticum aestivum subsp. aestivum	2	3	4	2
41445	PAK	LA	PAK76-2:37	71.9333	35.9417	1730	10.18730/6VQ94	Triticum aestivum subsp. aestivum	2	3	4	2
41451	PAK	LA	PAK76-2:65	72.3278	36.3	2160	10.18730/6VQFA	Triticum aestivum subsp. aestivum	2	3	4	2
41455	PAK	LA	PAK76-2::30	72.4581	36.09	2700	10.18730/6VQKE	Triticum aestivum subsp. aestivum	2	2	4	5
41457	PAK	LA	PAK76-2::44	72.5189	36.25	2400	10.18730/6VQNG	Triticum aestivum subsp. aestivum	2	2	1	5
41459	PAK	LA	PAK76-2::3	72.61	36.3333		10.18730/6VQQJ	Triticum aestivum subsp. aestivum	2	3	4	2
41460	PAK	LA	PAK76-2::71	72.6667	36.3333		10.18730/6VQRK	Triticum aestivum subsp. aestivum	2	3	4	2
41463	PAK	LA	PAK76-2:92	72.3886	36.3619	2850	10.18730/6VQVP	Triticum aestivum subsp. aestivum	1	1	3	4
41465	PAK	LA	PAK76-2:166	71.73	35.6833	2050	10.18730/6VQWQ	Triticum aestivum subsp. aestivum	1	1	3	4
41468	PAK	LA	PAK76-2:1	72.47	34.19	460	10.18730/6VQZT	Triticum aestivum subsp. aestivum	2	3	4	2
41470	PAK	LA	PAK76-2:42	71.7667	35.7167	1500	10.18730/6VR1W	Triticum aestivum subsp. aestivum	2	2	4	2
41471	PAK	LA	PAK76-2:42	71.7667	35.7167	1500	10.18730/6VR2X	Triticum aestivum subsp. aestivum	2	3	4	2
41474	PAK	LA	PAK76-2:70a	72.5167	34.9167	1410	10.18730/6VR5*	Triticum aestivum subsp. aestivum	2	3	4	2
41475	PAK	LA	PAK76-2:70a	72.5167	34.9167	1410	10.18730/6VR6~	Triticum aestivum subsp. aestivum	1	1	3	4
41476	PAK	LA	PAK76-2:18	72.5333	34.9	1750	10.18730/6VR7$	Triticum aestivum subsp. aestivum	1	2	1	5
41477	PAK	LA	PAK76-2:18	72.5333	34.9	1750	10.18730/6VR8=	Triticum aestivum subsp. aestivum	1	1	3	4
41478	PAK	LA	PAK76-2:19	72.5639	34.9	1980	10.18730/6VR9U	Triticum aestivum subsp. aestivum	2	3	4	2
41479	PAK	LA	PAK76-2:19	72.5639	34.9	1980	10.18730/6VRA0	Triticum aestivum subsp. aestivum	2	3	4	2
41480	PAK	LA	PAK76-2:26	72.55	35.21	1500	10.18730/6VRB1	Triticum aestivum subsp. aestivum	2	3	4	2
41481	PAK	LA	PAK76-2:26	72.55	35.21	1500	10.18730/6VRC2	Triticum aestivum subsp. aestivum	1	1	3	4
41482	PAK	LA	PAK76-2:26	72.55	35.21	1500	10.18730/6VRD3	Triticum aestivum subsp. aestivum	2	3	4	2
41483	PAK	LA	PAK76-2:26	72.55	35.21	1500	10.18730/6VRE4	Triticum aestivum subsp. aestivum	1	1	3	4
41484	PAK	LA	PAK76-2:29	72.55	35.2167	1620	10.18730/6VRF5	Triticum aestivum subsp. aestivum	2	3	4	2
41486	PAK	LA	PAK76-2:29	72.55	35.2167	1620	10.18730/6VRH7	Triticum aestivum subsp. aestivum	1	1	3	4
41487	PAK	LA	PAK76-2:29	72.55	35.2167	1620	10.18730/6VRJ8	Triticum aestivum subsp. aestivum	2	2	1	5
41489	PAK	LA	PAK76-2:29	72.55	35.2167	1620	10.18730/6VRMA	Triticum aestivum subsp. aestivum	1	1	3	4
41494	PAK	LA	PAK76-2:147	71.3667	36.07	2930	10.18730/6VRSF	Triticum aestivum subsp. aestivum	2	2	1	5
41498	PAK	LA	PAK76-2:123	72.8167	36.56	2600	10.18730/6VRXK	Triticum aestivum subsp. aestivum	1	2	1	5
41508	PAK	LA	PAK76-2:12	72.44	34.61	860	10.18730/6VS7X	Triticum aestivum subsp. aestivum	1	2	3	5
41511	PAK	LA	PAK76-2:57	72.2	36.29	2000	10.18730/6VSA*	Triticum aestivum subsp. aestivum	2	3	4	2
41512	PAK	LA	PAK76-2:57	72.2	36.29	2000	10.18730/6VSB~	Triticum aestivum subsp. aestivum	1	1	3	4
41513	PAK	LA	PAK76-2:8	72.6	34.5	760	10.18730/6VSC$	Triticum aestivum subsp. aestivum	1	1	3	4
41514	PAK	LA	PAK76-2:8	72.6	34.5	760	10.18730/6VSD=	Triticum aestivum subsp. aestivum	1	2	3	5
41516	PAK	LA	PAK76-2:16	72.2167	34.9	1340	10.18730/6VSF0	Triticum aestivum subsp. aestivum	1	1	3	4
41517	PAK	LA	PAK76-2:16	72.2167	34.9	1340	10.18730/6VSG1	Triticum aestivum subsp. aestivum	2	3	4	2
41519	PAK	LA	PAK76-2:82	72.3533	36.4383	2320	10.18730/6VSJ3	Triticum aestivum subsp. aestivum	1	2	3	5
41522	PAK	LA	PAK76-2:100	72.4833	36.1833	2610	10.18730/6VSN6	Triticum aestivum subsp. aestivum	2	3	4	2
41525	PAK	LA	PAK76-2:126	72.8667	36.5833	2700	10.18730/6VSR9	Triticum aestivum subsp. aestivum	2	2	4	2
41526	PAK	LA	PAK76-2:126	72.8667	36.5833	2700	10.18730/6VSSA	Triticum aestivum subsp. aestivum	2	3	4	2
41528	PAK	LA	PAK76-2::63	72.5333	34.9		10.18730/6VSVC	Triticum aestivum subsp. aestivum	1	1	3	4
41531	PAK	LA	PAK76-2::34	71.5	35.99	2400	10.18730/6VSYF	Triticum aestivum subsp. aestivum	1	1	3	4
41532	PAK	LA	PAK76-2::34	71.5	35.99	2400	10.18730/6VSZG	Triticum aestivum subsp. aestivum	1	1	3	4
41534	PAK	LA	PAK76-2::34	71.5	35.99	2400	10.18730/6VT1J	Triticum aestivum subsp. aestivum	1	1	3	4
41535	PAK	LA	PAK76-2:12	72.44	34.61	860	10.18730/6VT2K	Triticum aestivum subsp. aestivum	2	3	4	2
41538	PAK	LA	PAK76-2:40	72.01	36.03	1850	10.18730/6VT5P	Triticum aestivum subsp. aestivum	2	3	4	2
41540	PAK	LA	PAK76-2:138	71.5167	35.99	2310	10.18730/6VT7R	Triticum aestivum subsp. aestivum	1	2	1	5
41541	PAK	LA	PAK76-2::13	71.9667	35.4167		10.18730/6VT8S	Triticum aestivum subsp. aestivum	1	1	3	4
41542	PAK	LA	PAK76-2::13	71.9667	35.4167		10.18730/6VT9T	Triticum aestivum subsp. aestivum	1	1	3	4
41547	PAK	LA	PAK76-2:4	72.52	34.53	860	10.18730/6VTEZ	Triticum aestivum subsp. aestivum	1	2	3	5
41548	PAK	LA	PAK76-2:4	72.52	34.53	860	10.18730/6VTF*	Triticum aestivum subsp. aestivum	1	1	3	4
41550	PAK	LA	PAK81::9	67.01	30.59	1500	10.18730/6VTH$	Triticum aestivum subsp. aestivum	2	3	4	2
41559	PAK	LA	PAK81::4	66.84	30.64	1380	10.18730/6VTT6	Triticum aestivum subsp. aestivum	2	3	4	2
41561	PAK	LA	PAK81:190	66.9256	30.2725	1380	10.18730/6VTW8	Triticum aestivum subsp. aestivum	2	3	4	2
41562	PAK	LA	PAK81:193	67.17	30.27	2020	10.18730/6VTX9	Triticum aestivum subsp. aestivum	1	2	3	5
41563	PAK	LA	PAK81:193	67.17	30.27	2020	10.18730/6VTYA	Triticum aestivum subsp. aestivum	2	3	4	2
41564	PAK	LA	PAK81::2	67.25	30.5167	2000	10.18730/6VTZB	Triticum aestivum subsp. aestivum	1	2	1	5
41569	PAK	LA	PAK81:197	66.89	29.3267	1750	10.18730/6VV4G	Triticum aestivum subsp. aestivum	2	3	4	2
41570	PAK	LA	PAK81:198	66.5831	29.8719	1630	10.18730/6VV5H	Triticum aestivum subsp. aestivum	2	3	4	2
41571	PAK	LA	PAK81:198	66.5831	29.8719	1630	10.18730/6VV6J	Triticum aestivum subsp. aestivum	2	3	4	2
41574	PAK	LA	PAK81:199	66.85	29.7333	1600	10.18730/6VV9N	Triticum aestivum subsp. aestivum	2	3	4	2
41576	PAK	LA	PAK81:203	66.63	29.89	1630	10.18730/6VVBQ	Triticum aestivum subsp. aestivum	2	3	4	2
41577	PAK	LA	PAK81:205	66.54	29.8	1880	10.18730/6VVCR	Triticum aestivum subsp. aestivum	2	3	4	2
41580	PAK	LA	PAK81:207	66.32	28.67	1760	10.18730/6VVFV	Triticum aestivum subsp. aestivum	2	3	4	2
41581	PAK	LA	PAK81:208	66.26	28.49	1700	10.18730/6VVGW	Triticum aestivum subsp. aestivum	2	3	4	2
41582	PAK	LA	PAK81:209	66.2	28.43	1640	10.18730/6VVHX	Triticum aestivum subsp. aestivum	2	3	4	2
41586	PAK	LA	PAK81:211	66.3	28.37	1630	10.18730/6VVN~	Triticum aestivum subsp. aestivum	2	3	4	2
41594	PAK	LA	PAK81:217	65.63	28.33	890	10.18730/6VVX4	Triticum aestivum subsp. aestivum	2	3	4	2
41596	PAK	LA	PAK81:220	65.5333	28.6667	800	10.18730/6VVZ6	Triticum aestivum subsp. aestivum	2	3	4	2
41597	PAK	LA	PAK81:221	65.6167	28.9833	1070	10.18730/6VW07	Triticum aestivum subsp. aestivum	2	3	4	2
41599	PAK	LA	PAK81:223	65.93	29.3333	1250	10.18730/6VW29	Triticum aestivum subsp. aestivum	2	3	4	2
41601	PAK	LA	PAK81:224	65.95	29.35	1150	10.18730/6VW4B	Triticum aestivum subsp. aestivum	2	3	4	2
41602	PAK	LA	PAK81:225	66.81	30.1667	1550	10.18730/6VW5C	Triticum aestivum subsp. aestivum	2	3	4	2
41603	PAK	LA	PAK81:225	66.81	30.1667	1550	10.18730/6VW6D	Triticum aestivum subsp. aestivum	2	3	4	2
41607	PAK	LA	PAK81:226	66.72	29.95	1550	10.18730/6VWAH	Triticum aestivum subsp. aestivum	2	3	4	2
41608	PAK	LA	PAK81:229	66.7242	29.8281	1570	10.18730/6VWBJ	Triticum aestivum subsp. aestivum	2	3	4	2
41613	PAK	LA	PAK81:230	66.6667	30.25	1580	10.18730/6VWGQ	Triticum aestivum subsp. aestivum	2	3	4	2
41615	PAK	LA	PAK81:231	67.31	30.43	1900	10.18730/6VWJS	Triticum aestivum subsp. aestivum	2	3	4	2
41620	PAK	LA	PAK81:232	67.36	30.46	2100	10.18730/6VWQY	Triticum aestivum subsp. aestivum	2	3	4	2
41632	PAK	LA	PAK81:242	68.35	30.29	1600	10.18730/6VX35	Triticum aestivum subsp. aestivum	1	2	1	5
41634	PAK	LA	PAK81:243	68.5	30.31	1580	10.18730/6VX57	Triticum aestivum subsp. aestivum	2	3	4	2
41635	PAK	LA	PAK81:243	68.5	30.31	1580	10.18730/6VX68	Triticum aestivum subsp. aestivum	2	3	4	2
41636	PAK	LA	PAK81:243	68.5	30.31	1580	10.18730/6VX79	Triticum aestivum subsp. aestivum	2	3	4	2
41641	PAK	LA	PAK81:244	68.57	30.34	1450	10.18730/6VXCE	Triticum aestivum subsp. aestivum	2	3	4	2
41642	PAK	LA	PAK81:246	68.1833	30.3064	1720	10.18730/6VXDF	Triticum aestivum subsp. aestivum	2	3	4	2
41644	PAK	LA	PAK81:247	68.1	30.1261	1820	10.18730/6VXFH	Triticum aestivum subsp. aestivum	2	3	4	2
41648	PAK	LA	PAK81:250	67.55	30.26	1320	10.18730/6VXKN	Triticum aestivum subsp. aestivum	2	3	4	2
41650	PAK	LA	PAK81:250	67.55	30.26	1320	10.18730/6VXNQ	Triticum aestivum subsp. aestivum	2	3	4	2
41652	PAK	LA	PAK81:254	67.9167	29.5167	200	10.18730/6VXQS	Triticum aestivum subsp. aestivum	2	3	4	2
41653	PAK	LA	PAK81:257	67.8667	29.5167	200	10.18730/6VXRT	Triticum aestivum subsp. aestivum	1	2	1	5
41654	PAK	LA	PAK81:258	67.64	29.5833	230	10.18730/6VXSV	Triticum aestivum subsp. aestivum	1	1	3	4
41655	PAK	LA	PAK81:259	67.36	29.43	1720	10.18730/6VXTW	Triticum aestivum subsp. aestivum	1	1	3	4
41659	PAK	LA	PAK81:261	67.0167	29.9833	1710	10.18730/6VXY*	Triticum aestivum subsp. aestivum	2	3	4	2
41662	PAK	LA	PAK81:261	67.0167	29.9833	1710	10.18730/6VY1=	Triticum aestivum subsp. aestivum	2	3	4	2
41663	PAK	LA	PAK81:261	67.0167	29.9833	1710	10.18730/6VY2U	Triticum aestivum subsp. aestivum	2	3	4	2
41669	PAK	LA	PAK81:264	66.9994	29.9908	1740	10.18730/6VY85	Triticum aestivum subsp. aestivum	2	3	4	2
41670	PAK	LA	PAK81:264	66.9994	29.9908	1740	10.18730/6VY96	Triticum aestivum subsp. aestivum	2	3	4	2
41673	PAK	LA	PAK81:265	67.055	29.955	1720	10.18730/6VYC9	Triticum aestivum subsp. aestivum	2	3	4	2
41678	PAK	LA	PAK81:266	67.3319	30.0978	1830	10.18730/6VYHE	Triticum aestivum subsp. aestivum	2	3	4	2
41680	PAK	LA	PAK81:267	67.3333	30.0833	1650	10.18730/6VYKG	Triticum aestivum subsp. aestivum	2	3	4	2
41683	PAK	LA	PAK81:350	66.5833	30.5	1550	10.18730/6VYPK	Triticum aestivum subsp. aestivum	2	3	4	2
41684	PAK	LA	PAK76-2::1	72.69	34.305	1980	10.18730/6VYQM	Triticum aestivum subsp. aestivum	2	3	4	2
41688	PAK	LA	PAK81:353	66.86	30.83	1940	10.18730/6VYVR	Triticum aestivum subsp. aestivum	2	3	4	2
41691	PAK	LA	PAK81::25	67.35	30.4081	1730	10.18730/6VYYV	Triticum aestivum subsp. aestivum	2	3	4	2
41695	PAK	LA	PAK81:360	67.04	30.83	2000	10.18730/6VZ2Z	Triticum aestivum subsp. aestivum	2	3	4	2
41697	PAK	LA	PAK81:362	67.28	31.06	2200	10.18730/6VZ4~	Triticum aestivum subsp. aestivum	2	3	4	2
41704	PAK	LA	PAK81:367	67.8719	30.23	2050	10.18730/6VZB3	Triticum aestivum subsp. aestivum	2	3	4	2
41709	PAK	LA	PAK81:373	67.0167	30.55	1550	10.18730/6VZG8	Triticum aestivum subsp. aestivum	2	3	4	2
41710	PAK	LA	PAK81:373	67.0167	30.55	1550	10.18730/6VZH9	Triticum aestivum subsp. aestivum	2	3	4	2
41713	PAK	LA	PAK81:374	66.8333	29.8333	1540	10.18730/6VZMC	Triticum aestivum subsp. aestivum	2	3	4	2
41715	PAK	LA	PAK81:377	66.75	29.6667	1550	10.18730/6VZPE	Triticum aestivum subsp. aestivum	2	3	4	2
41722	PAK	LA	PAK81:387	65.1667	29.0833	850	10.18730/6VZXN	Triticum aestivum subsp. aestivum	2	3	4	2
41734	PAK	LA	PAK81::8	65.98	29.4833	960	10.18730/6W09~	Triticum aestivum subsp. aestivum	2	3	4	2
41735	PAK	LA	PAK81:400	66.01	29.4833	970	10.18730/6W0A$	Triticum aestivum subsp. aestivum	2	3	4	2
41737	PAK	LA	PAK81:402	66.0833	29.55	1250	10.18730/6W0CU	Triticum aestivum subsp. aestivum	2	3	4	2
41738	PAK	LA	PAK81::16	66.1667	29.43	1530	10.18730/6W0D0	Triticum aestivum subsp. aestivum	2	3	4	2
41741	PAK	LA	PAK81:406	66.4833	29.9333	1490	10.18730/6W0G3	Triticum aestivum subsp. aestivum	2	3	4	2
41742	PAK	LA	PAK81:406	66.4833	29.9333	1490	10.18730/6W0H4	Triticum aestivum subsp. aestivum	2	3	4	2
41743	PAK	LA	PAK81:406	66.4833	29.9333	1490	10.18730/6W0J5	Triticum aestivum subsp. aestivum	2	3	4	2
41744	PAK	LA	PAK81::30	66.6667	30.05	2000	10.18730/6W0K6	Triticum aestivum subsp. aestivum	2	3	4	2
41745	PAK	LA	PAK81::23	66.85	30.0167	2370	10.18730/6W0M7	Triticum aestivum subsp. aestivum	2	3	4	2
41749	PAK	LA	PAK81::28	67.5	30.38	1660	10.18730/6W0RB	Triticum aestivum subsp. aestivum	2	3	4	2
41750	PAK	LA	PAK81::7	67.5833	30.47	2050	10.18730/6W0SC	Triticum aestivum subsp. aestivum	2	3	4	2
41753	PAK	LA	PAK81::27	68	30.65	2130	10.18730/6W0WF	Triticum aestivum subsp. aestivum	2	3	4	2
41757	PAK	LA	PAK81::5	68.6942	31.0889	1550	10.18730/6W10K	Triticum aestivum subsp. aestivum	2	3	4	2
41758	PAK	LA	PAK81:419	68.5667	30.6667	1520	10.18730/6W11M	Triticum aestivum subsp. aestivum	2	3	4	2
41759	PAK	LA	PAK81:419	68.5667	30.6667	1520	10.18730/6W12N	Triticum aestivum subsp. aestivum	2	3	4	2
41763	PAK	LA	PAK81:423	68.375	30.2978	1550	10.18730/6W16S	Triticum aestivum subsp. aestivum	2	3	4	2
41764	PAK	LA	PAK81::12	68.37	30.37	1965	10.18730/6W17T	Triticum aestivum subsp. aestivum	2	3	4	2
41767	PAK	LA	PAK81:426	67.42	30.0167	2280	10.18730/6W1AX	Triticum aestivum subsp. aestivum	2	3	4	2
41768	PAK	LA	PAK81:429	66.46	30.5	1890	10.18730/6W1BY	Triticum aestivum subsp. aestivum	2	3	4	2
41778	PAK	LA	PAK81:437	67.57	30.24	1250	10.18730/6W1N3	Triticum aestivum subsp. aestivum	2	3	4	2
41779	PAK	LA	PAK81::1	67	30.2333		10.18730/6W1P4	Triticum aestivum subsp. aestivum	2	3	4	2
41781	PAK	LA	PAK81:391	64.675	29.3039	870	10.18730/6W1R6	Triticum aestivum subsp. aestivum	2	3	4	2
41796	PAK	LA	PAK82::8	73.1667	33.8194	1100	10.18730/6W27N	Triticum aestivum subsp. aestivum	2	3	4	2
41797	PAK	LA	PAK82::9	73.36	33.89	1500	10.18730/6W28P	Triticum aestivum subsp. aestivum	2	3	4	2
41798	PAK	LA	PAK82::10	73.8639	33.79	1550	10.18730/6W29Q	Triticum aestivum subsp. aestivum	2	3	4	2
41800	PAK	LA	PAK82:638	73.6667	34.02	1300	10.18730/6W2BS	Triticum aestivum subsp. aestivum	2	3	4	2
41801	PAK	LA	PAK82::5	73.8	33.8333	1650	10.18730/6W2CT	Triticum aestivum subsp. aestivum	2	3	4	2
41870	PAK	LA	PAK81:401	66.0167	29.55	900	10.18730/6W4HN	Triticum aestivum subsp. aestivum	2	3	4	2
41871	PAK	LA	PAK82::5	73.8	33.8333	1650	10.18730/6W4JP	Triticum aestivum subsp. aestivum	2	3	4	2
41872	MAR	LA	MAR85:2	-9.54528	29.7064	500	10.18730/6W4KQ	Triticum aestivum subsp. aestivum	1	1	3	4
41875	MAR	CV	MAR85:4	-10.0667	28.9333	200	10.18730/6W4PT	Triticum aestivum subsp. aestivum	1	1	3	4
41877	MAR	CV	MAR85:5	-10	28.9281	200	10.18730/6W4RW	Triticum aestivum subsp. aestivum	1	1	3	4
41880	MAR	CV	MAR85:8	-9.425	29.0583	200	10.18730/6W4VZ	Triticum aestivum subsp. aestivum	1	2	1	5
41885	MAR	LA	MAR85:10	-8.63333	29.2333	450	10.18730/6W4Z=	Triticum aestivum subsp. aestivum	1	2	3	1
41887	MAR	LA	MAR85:11	-6.01389	30.4544	500	10.18730/6W510	Triticum aestivum subsp. aestivum	1	1	3	4
41889	MAR	LA	MAR85:13	-5.67389	35.1497	600	10.18730/6W532	Triticum aestivum subsp. aestivum	1	2	3	1
41890	MAR	LA	MAR85:16	-8	29.7667	700	10.18730/6W543	Triticum aestivum subsp. aestivum	1	2	3	1
41902	MAR	LA	MAR85:21	-6.86667	30.0833	550	10.18730/6W5ED	Triticum aestivum subsp. aestivum	1	1	3	4
41904	MAR	CV	MAR85:21	-6.86667	30.0833	550	10.18730/6W5GF	Triticum aestivum subsp. aestivum	1	1	3	4
41912	MAR	LA	MAR85:34	-5.83333	30.3	700	10.18730/6W5PN	Triticum aestivum subsp. aestivum	2	2	1	3
41919	MAR	LA	MAR85:40	-6.43333	30.6833	900	10.18730/6W5XW	Triticum aestivum subsp. aestivum	1	1	3	4
41921	MAR	CV	MAR85:42	-4.66861	33.4656	1150	10.18730/6W5ZY	Triticum aestivum subsp. aestivum	1	1	3	4
41922	MAR	LA	MAR85:45	-8.21417	29.7228	1300	10.18730/6W60Z	Triticum aestivum subsp. aestivum	1	2	3	5
41925	MAR	LA	MAR85:49	-4.95	31.53	900	10.18730/6W62~	Triticum aestivum subsp. aestivum	1	1	3	4
41929	MAR	LA	MAR85:52	-4.46667	31.5333	740	10.18730/6W660	Triticum aestivum subsp. aestivum	1	1	3	4
41934	MAR	CV	MAR85:57	-4.2	31.7	800	10.18730/6W6B5	Triticum aestivum subsp. aestivum	1	2	3	1
41938	MAR	LA	MAR85:68	-9.2475	32.2775	1	10.18730/6W6F9	Triticum aestivum subsp. aestivum	1	2	1	5
41939	MAR	LA	MAR85:70	-9.26667	32.1333	1	10.18730/6W6GA	Triticum aestivum subsp. aestivum	1	2	1	5
41940	MAR	LA	MAR85:72	-9.36083	31.9317	100	10.18730/6W6HB	Triticum aestivum subsp. aestivum	1	2	1	5
41941	MAR	LA	MAR85:76	-9.61667	31.7225	1	10.18730/6W6JC	Triticum aestivum subsp. aestivum	1	2	1	5
41942	MAR	LA	MAR85:77	-9.12583	30.7847		10.18730/6W6KD	Triticum aestivum subsp. aestivum	1	2	1	5
41943	MAR	LA	MAR85:79	-5.76583	35.4314	350	10.18730/6W6ME	Triticum aestivum subsp. aestivum	1	2	1	5
41944	MAR	LA	MAR85:82	-5.79139	35.3667	300	10.18730/6W6NF	Triticum aestivum subsp. aestivum	1	2	3	1
41945	MAR	LA	MAR85:83	-9.71833	31.3464	150	10.18730/6W6PG	Triticum aestivum subsp. aestivum	1	2	3	1
41946	MAR	CV	MAR85:85	-8.83333	31.5	350	10.18730/6W6QH	Triticum aestivum subsp. aestivum	1	1	3	4
41948	MAR	LA	MAR85:87	-8.78139	31.5511	200	10.18730/6W6SK	Triticum aestivum subsp. aestivum	1	2	1	5
41949	MAR	LA	MAR85:89	-8.61667	31.8667	200	10.18730/6W6TM	Triticum aestivum subsp. aestivum	1	2	3	5
41951	MAR	LA	MAR85:92	-7.16667	32.5	300	10.18730/6W6WP	Triticum aestivum subsp. aestivum	1	2	3	1
41953	MAR	CV	MAR85:95	-6.2575	33.5597	600	10.18730/6W6YR	Triticum aestivum subsp. aestivum	1	2	3	1
41955	MAR	LA	MAR85:96	-5.56667	33.0667	900	10.18730/6W70T	Triticum aestivum subsp. aestivum	1	2	1	5
41957	MAR	CV	MAR85:99	-3.63333	31.95	900	10.18730/6W72W	Triticum aestivum subsp. aestivum	1	2	3	1
41959	MAR	LA	MAR85:100	-3.451	31.952	850	10.18730/6W74Y	Triticum aestivum subsp. aestivum	1	2	1	5
41962	MAR	LA	MAR85:103	-3	32.05	800	10.18730/6W77~	Triticum aestivum subsp. aestivum	1	1	3	4
41965	MAR	LA	MAR85:108	-1.21667	32.1167	800	10.18730/6W7AU	Triticum aestivum subsp. aestivum	2	2	1	5
41966	MAR	CV	MAR85:110	-2.05028	34.4556	850	10.18730/6W7B0	Triticum aestivum subsp. aestivum	1	2	3	1
41968	MAR	LA	MAR85:115	-4.61833	34.4147	650	10.18730/6W7D2	Triticum aestivum subsp. aestivum	1	2	1	5
41969	MAR	CV	MAR85:120	-9.01611	29.94	1100	10.18730/6W7E3	Triticum aestivum subsp. aestivum	1	1	3	4
41972	MAR	LA	MAR85:143	-7.38	31.26	2200	10.18730/6W7H6	Triticum aestivum subsp. aestivum	1	2	1	5
41975	MAR	LA	MAR85:151	-5.49806	31.7525	1900	10.18730/6W7M9	Triticum aestivum subsp. aestivum	1	1	3	4
41976	MAR	LA	MAR85:152	-5.5	31.8	2000	10.18730/6W7NA	Triticum aestivum subsp. aestivum	1	2	1	5
41979	MAR	LA	MAR85:154	-5.66667	32.2333	2000	10.18730/6W7RD	Triticum aestivum subsp. aestivum	1	2	1	5
41982	MAR	LA	MAR85:171	-5.09111	35.2831	1600	10.18730/6W7VG	Triticum aestivum subsp. aestivum	1	2	1	5
41983	MAR	LA	MAR85:172	-5.09222	35.2831	1500	10.18730/6W7WH	Triticum aestivum subsp. aestivum	1	2	1	5
41985	MAR	LA	MAR85:190	-5.99778	33.43	1100	10.18730/6W7YK	Triticum aestivum subsp. aestivum	1	2	1	5
41986	MAR	CV	MAR85:208	-3.78972	34.7653	1300	10.18730/6W7ZM	Triticum aestivum subsp. aestivum	1	2	1	5
41991	MAR	LA	MAR85:230	-5.85861	35.2594	200	10.18730/6W84S	Triticum aestivum subsp. aestivum	1	2	1	5
41992	MAR	LA	MAR85:231	-5.09833	35.4217	1	10.18730/6W85T	Triticum aestivum subsp. aestivum	1	2	1	5
41993	MAR	LA	MAR85:234	-5.58889	35.8222	1	10.18730/6W86V	Triticum aestivum subsp. aestivum	1	2	1	5
41994	MAR	CV	MAR85:62	-7.23333	33.3	400	10.18730/6W87W	Triticum aestivum subsp. aestivum	1	2	1	5
41999	MAR	LA	MAR85:85	-8.83333	31.5	350	10.18730/6W8C~	Triticum aestivum subsp. aestivum	1	2	1	5
42000	MAR	LA	MAR85:30	-5.66667	30.2667	600	10.18730/6W8D$	Triticum aestivum subsp. aestivum	1	2	3	1
42002	MAR	LA	MAR85:29	-5.83611	30.3	700	10.18730/6W8FU	Triticum aestivum subsp. aestivum	1	1	3	4
42009	EGY	LA	EGY87:6	33.8797	31.0017	60	10.18730/6W8P6	Triticum aestivum subsp. aestivum	2	3	4	2
42010	EGY	LA	EGY87:8	34.1869	30.6489	170	10.18730/6W8Q7	Triticum aestivum subsp. aestivum	1	1	3	4
42011	EGY	LA	EGY87:8	34.1869	30.6489	170	10.18730/6W8R8	Triticum aestivum subsp. aestivum	2	3	4	2
42012	EGY	LA	EGY87:16	33.95	31.1617	6	10.18730/6W8S9	Triticum aestivum subsp. aestivum	1	2	3	1
42013	EGY	LA	EGY87:16	33.95	31.1617	6	10.18730/6W8TA	Triticum aestivum subsp. aestivum	1	2	1	5
42014	EGY	LA	EGY87:22	34.1483	31.0822	90	10.18730/6W8VB	Triticum aestivum subsp. aestivum	2	3	4	2
42015	EGY	LA	EGY87:22	34.1483	31.0822	90	10.18730/6W8WC	Triticum aestivum subsp. aestivum	1	2	1	5
42019	EGY	LA	EGY87:23	34.1486	31.0861	95	10.18730/6W90G	Triticum aestivum subsp. aestivum	2	2	4	2
42022	EGY	LA	EGY87:23	34.1486	31.0861	95	10.18730/6W93K	Triticum aestivum subsp. aestivum	2	3	4	2
42029	EGY	LA	EGY87:33	33.9758	29.9836	390	10.18730/6W99S	Triticum aestivum subsp. aestivum	1	2	1	5
42030	EGY	LA	EGY87:42	27.195	31.3697	10	10.18730/6W9AT	Triticum aestivum subsp. aestivum	1	2	3	2
42033	EGY	LA	EGY87:46	26.8717	31.4297	5	10.18730/6W9DX	Triticum aestivum subsp. aestivum	2	3	4	2
42035	EGY	LA	EGY87:50	26.4333	31.5	10	10.18730/6W9FZ	Triticum aestivum subsp. aestivum	1	2	3	5
42037	EGY	LA	EGY87:52	27.1389	31.2731	110	10.18730/6W9H~	Triticum aestivum subsp. aestivum	1	2	3	2
42039	EGY	LA	EGY87:54	27.0578	31.3006	125	10.18730/6W9K=	Triticum aestivum subsp. aestivum	1	1	3	4
42040	EGY	LA	EGY87:55	26.7733	31.3514	145	10.18730/6W9MU	Triticum aestivum subsp. aestivum	2	2	4	2
42042	EGY	LA	EGY87:58	26.6347	31.4378	70	10.18730/6W9P1	Triticum aestivum subsp. aestivum	1	2	3	2
42045	EGY	LA	EGY87:68	25.8667	31.5833	30	10.18730/6W9R3	Triticum aestivum subsp. aestivum	1	1	3	4
42054	EGY	LA	EGY87:83	28.4333	31		10.18730/6WA0B	Triticum aestivum subsp. aestivum	2	3	4	2
42056	EGY	LA	EGY87:86	28.3836	30.9758	15	10.18730/6WA2D	Triticum aestivum subsp. aestivum	2	3	4	2
42058	EGY	LA	EGY87:88	28.8833	30.8167		10.18730/6WA4F	Triticum aestivum subsp. aestivum	2	3	4	2
42059	EGY	LA	EGY87:90	29.3331	30.8403	10	10.18730/6WA5G	Triticum aestivum subsp. aestivum	1	1	3	4
42060	EGY	LA	EGY87:91	28.4333	30.75		10.18730/6WA6H	Triticum aestivum subsp. aestivum	1	1	3	4
42073	MAR	LA	MAR87-1:3	-6.25472	33.9328	490	10.18730/6WAKY	Triticum aestivum subsp. aestivum	1	2	3	1
42074	MAR	LA	MAR87-1:8	-6.28333	33.8167	520	10.18730/6WAMZ	Triticum aestivum subsp. aestivum	1	2	3	1
42075	MAR	LA	MAR87-1:9	-6.13222	33.6083	800	10.18730/6WAN*	Triticum aestivum subsp. aestivum	1	2	3	1
42077	MAR	LA	MAR87-1:11	-6.18083	33.4925	1100	10.18730/6WAQ$	Triticum aestivum subsp. aestivum	1	2	3	1
42080	MAR	LA	MAR87-1:17	-4.90583	33.6447	1940	10.18730/6WAT0	Triticum aestivum subsp. aestivum	1	1	3	4
42081	MAR	LA	MAR87-1:21	-5.01444	33.4833	2070	10.18730/6WAV1	Triticum aestivum subsp. aestivum	1	2	3	1
42082	MAR	LA	MAR87-1:22	-5.15028	33.5017	1800	10.18730/6WAW2	Triticum aestivum subsp. aestivum	1	2	1	5
42083	MAR	LA	MAR87-1:22	-5.15028	33.5017	1800	10.18730/6WAX3	Triticum aestivum subsp. aestivum	1	2	1	5
42085	MAR	LA	MAR87-1:24	-5.33889	33.6017	1400	10.18730/6WAZ5	Triticum aestivum subsp. aestivum	1	2	1	5
42086	MAR	LA	MAR87-1:26	-4.85917	34.8811	850	10.18730/6WB06	Triticum aestivum subsp. aestivum	1	2	1	5
42087	MAR	LA	MAR87-1:31	-4.42028	33.9331	1000	10.18730/6WB17	Triticum aestivum subsp. aestivum	1	2	3	1
42088	MAR	LA	MAR87-1:34	-1.98	34.5578	1250	10.18730/6WB28	Triticum aestivum subsp. aestivum	1	2	3	1
42089	MAR	LA	MAR87-1:36	-2.14444	34.4981	1350	10.18730/6WB39	Triticum aestivum subsp. aestivum	1	2	3	1
42091	MAR	LA	MAR87-1:41	-2.07972	34.3728	1650	10.18730/6WB5B	Triticum aestivum subsp. aestivum	1	2	1	5
42092	MAR	LA	MAR87-1:45	-3.60361	35.0039	950	10.18730/6WB6C	Triticum aestivum subsp. aestivum	1	2	3	1
42093	MAR	LA	MAR87-1:46	-3.60361	35.0039	950	10.18730/6WB7D	Triticum aestivum subsp. aestivum	1	2	3	1
42094	MAR	LA	MAR87-1:48	-3.89667	35.0142	1050	10.18730/6WB8E	Triticum aestivum subsp. aestivum	1	2	3	1
42095	MAR	LA	MAR87-1:49	-3.92694	34.9597	1550	10.18730/6WB9F	Triticum aestivum subsp. aestivum	1	2	3	1
42097	MAR	LA	MAR87-1:54	-4.1075	35.1828	700	10.18730/6WBBH	Triticum aestivum subsp. aestivum	1	2	3	1
42099	MAR	LA	MAR87-1:56	-4.97222	35.0111	1275	10.18730/6WBDK	Triticum aestivum subsp. aestivum	1	2	3	1
42102	MAR	LA	MAR87-1:60	-5.17222	35.0625	850	10.18730/6WBGP	Triticum aestivum subsp. aestivum	1	2	3	1
42103	MAR	LA	MAR87-1:61	-5.20528	35.0861	700	10.18730/6WBHQ	Triticum aestivum subsp. aestivum	1	2	3	1
42105	MAR	LA	MAR87-1:66	-5.22778	35.53	1	10.18730/6WBKS	Triticum aestivum subsp. aestivum	1	2	3	1
42106	MAR	LA	MAR87-1:67	-5.15806	35.5036	1	10.18730/6WBMT	Triticum aestivum subsp. aestivum	1	1	3	4
42107	MAR	LA	MAR87-1:69	-5.1	35.4333	1	10.18730/6WBNV	Triticum aestivum subsp. aestivum	1	2	3	1
42110	MAR	LA	MAR87-1:79	-5.06222	34.1825	1000	10.18730/6WBRY	Triticum aestivum subsp. aestivum	1	2	1	5
42113	MAR	LA	MAR87-1:87	-3.57583	34.3731	780	10.18730/6WBV~	Triticum aestivum subsp. aestivum	1	2	3	5
42114	MAR	LA	MAR87-1:89	-2.64639	34.6222	800	10.18730/6WBW$	Triticum aestivum subsp. aestivum	1	1	3	4
42116	MAR	LA	MAR87-1:92	-2.10583	34.9667	550	10.18730/6WBYU	Triticum aestivum subsp. aestivum	1	2	3	1
42118	MAR	LA	MAR87-1:99	-4.06028	35.1011	700	10.18730/6WC01	Triticum aestivum subsp. aestivum	1	2	1	5
42119	MAR	LA	MAR87-1:102	-5.41667	35.6656	350	10.18730/6WC12	Triticum aestivum subsp. aestivum	1	2	1	5
42120	MAR	LA	MAR87-1:103	-5.46917	35.7847	400	10.18730/6WC23	Triticum aestivum subsp. aestivum	1	2	1	5
42121	MAR	LA	MAR87-1:103	-5.46917	35.7847	400	10.18730/6WC34	Triticum aestivum subsp. aestivum	1	2	1	5
42128	PAK	LA	PAK81:216	65.61	28.24	1100	10.18730/6WCAB	Triticum aestivum subsp. aestivum	2	3	4	2
42132	PAK	LA	PAK81:253	68	29.5833	190	10.18730/6WCEF	Triticum aestivum subsp. aestivum	2	3	4	2
42135	PAK	LA	PAK81:259	67.36	29.43	1720	10.18730/6WCHJ	Triticum aestivum subsp. aestivum	2	3	4	2
42142	PAK	LA	PAK81::15	66.29	29.6	1470	10.18730/6WCRS	Triticum aestivum subsp. aestivum	2	3	4	2
42144	PAK	LA	PAK81::24	67.6	29.8333	555	10.18730/6WCTV	Triticum aestivum subsp. aestivum	1	2	3	5
42146	PAK	LA	PAK82:604	73.68	33.69	1250	10.18730/6WCWX	Triticum aestivum subsp. aestivum	1	2	3	1
42149	PAK	LA	PAK82:606	73.53	34.31	1050	10.18730/6WCZ*	Triticum aestivum subsp. aestivum	1	1	3	4
42150	PAK	LA	PAK82::7	73.4739	34.25	900	10.18730/6WD0~	Triticum aestivum subsp. aestivum	1	2	3	5
42151	PAK	LA	PAK82::7	73.4739	34.25	900	10.18730/6WD1$	Triticum aestivum subsp. aestivum	2	3	4	2
42152	PAK	LA	PAK82:609	73.4	34.38	800	10.18730/6WD2=	Triticum aestivum subsp. aestivum	2	3	4	2
42154	PAK	LA	PAK82:609	73.4	34.38	800	10.18730/6WD40	Triticum aestivum subsp. aestivum	2	3	4	2
42155	PAK	LA	PAK82::3	73.48	34.25	850	10.18730/6WD51	Triticum aestivum subsp. aestivum	2	3	4	2
42157	PAK	LA	PAK82:640	73.75	33.9264	1640	10.18730/6WD73	Triticum aestivum subsp. aestivum	1	2	3	5
42158	PAK	LA	PAK82::5	73.8	33.8333	1650	10.18730/6WD84	Triticum aestivum subsp. aestivum	1	2	3	5
42160	PAK	LA	PAK82:549	73.59	34.32	1750	10.18730/6WDA6	Triticum aestivum subsp. aestivum	2	3	4	2
42161	PAK	LA	PAK82::4	73.7339	34.39	1450	10.18730/6WDB7	Triticum aestivum subsp. aestivum	1	2	3	5
42187	TUR	LA	TUR79-2:19	39.5167	38.5333	1310	10.18730/7MTW4	Triticum aestivum subsp. aestivum	1	2	3	5
42188	TUR	LA	TUR79-2:19	39.5167	38.5333	1310	10.18730/7MTX5	Triticum aestivum subsp. aestivum	1	2	3	5
42190	TUR	LA	TUR79-2:28	42.1833	38.45	1720	10.18730/7MTZ7	Triticum aestivum subsp. aestivum	2	2	4	3
42192	TUR	LA	TUR79-2:29	42.1667	38.4833	1780	10.18730/7MV19	Triticum aestivum subsp. aestivum	2	3	4	2
42194	TUR	LA	TUR79-2:31	42.4167	38.6167	1650	10.18730/7MV3B	Triticum aestivum subsp. aestivum	2	3	4	3
42196	TUR	LA	TUR79-2:31	42.4167	38.6167	1650	10.18730/7MV5D	Triticum aestivum subsp. aestivum	2	2	1	3
42199	TUR	LA	TUR79-2:34	42.45	38.75	1880	10.18730/7MV8G	Triticum aestivum subsp. aestivum	2	2	2	3
42203	TUR	LA	TUR79-2:35	42.45	38.9	2000	10.18730/7MVCM	Triticum aestivum subsp. aestivum	2	2	1	3
42204	TUR	LA	TUR79-2:35	42.45	38.9	2000	10.18730/7MVDN	Triticum aestivum subsp. aestivum	2	2	1	3
42205	TUR	LA	TUR79-2:35	42.45	38.9	2000	10.18730/7MVEP	Triticum aestivum subsp. aestivum	2	2	1	3
42206	TUR	LA	TUR79-2:35	42.45	38.9	2000	10.18730/7MVFQ	Triticum aestivum subsp. aestivum	2	2	1	3
42208	TUR	LA	TUR79-2:35	42.45	38.9	2000	10.18730/7MVHS	Triticum aestivum subsp. aestivum	2	2	1	3
42209	TUR	LA	TUR79-2:35	42.45	38.9	2000	10.18730/7MVJT	Triticum aestivum subsp. aestivum	2	2	1	3
42210	TUR	LA	TUR79-2:35	42.45	38.9	2000	10.18730/7MVKV	Triticum aestivum subsp. aestivum	2	2	1	3
42211	TUR	LA	TUR79-2:35	42.45	38.9	2000	10.18730/7MVMW	Triticum aestivum subsp. aestivum	2	2	1	3
42212	TUR	LA	TUR79-2:40	42.3333	39.0667	1610	10.18730/7MVNX	Triticum aestivum subsp. aestivum	2	2	1	3
42213	TUR	LA	TUR79-2:40	42.3333	39.0667	1610	10.18730/7MVPY	Triticum aestivum subsp. aestivum	2	2	1	3
42217	TUR	LA	TUR79-2:41	42.7333	39.1333	1610	10.18730/6WE1X	Triticum aestivum subsp. aestivum	1	2	1	5
42224	TUR	LA	TUR79-2:42	43.2167	38.95	1700	10.18730/6WE8U	Triticum aestivum subsp. aestivum	2	2	1	3
42225	TUR	LA	TUR79-2:44	42.45	38.4667	1700	10.18730/6WE90	Triticum aestivum subsp. aestivum	2	2	2	3
42227	TUR	LA	TUR79-2:45	42.7	38.35	1880	10.18730/6WEB2	Triticum aestivum subsp. aestivum	2	2	2	3
42238	TUR	LA	TUR79-2:49	43.4667	38.2667	1840	10.18730/6WEPD	Triticum aestivum subsp. aestivum	2	2	1	3
42242	TUR	LA	TUR79-2:49	43.4667	38.2667	1840	10.18730/6WETH	Triticum aestivum subsp. aestivum	2	2	1	3
42244	TUR	LA	TUR79-2:49	43.4667	38.2667	1840	10.18730/6WEWK	Triticum aestivum subsp. aestivum	2	2	1	3
42246	TUR	LA	TUR79-2:51	43.8833	38.2333	2250	10.18730/6WEYN	Triticum aestivum subsp. aestivum	2	2	1	3
42247	TUR	LA	TUR79-2:51	43.8833	38.2333	2250	10.18730/6WEZP	Triticum aestivum subsp. aestivum	2	2	1	3
42248	TUR	LA	TUR79-2:51	43.8833	38.2333	2250	10.18730/6WF0Q	Triticum aestivum subsp. aestivum	2	2	1	3
42249	TUR	LA	TUR79-2:51	43.8833	38.2333	2250	10.18730/6WF1R	Triticum aestivum subsp. aestivum	2	2	1	3
42250	TUR	LA	TUR79-2:51	43.8833	38.2333	2250	10.18730/6WF2S	Triticum aestivum subsp. aestivum	2	2	1	3
42251	TUR	LA	TUR79-2:51	43.8833	38.2333	2250	10.18730/6WF3T	Triticum aestivum subsp. aestivum	2	2	1	3
42261	TUR	LA	TUR79-2:52	44.0167	38.1667	2250	10.18730/6WFDU	Triticum aestivum subsp. aestivum	2	2	1	3
42262	TUR	LA	TUR79-2:54	44.5667	37.3	1450	10.18730/6WFE0	Triticum aestivum subsp. aestivum	2	3	4	3
42267	TUR	LA	TUR79-2:56	44.5667	37.1667	1550	10.18730/6WFK5	Triticum aestivum subsp. aestivum	2	2	2	3
42268	TUR	LA	TUR79-2:56	44.5667	37.1667	1550	10.18730/6WFM6	Triticum aestivum subsp. aestivum	2	2	1	3
42270	TUR	LA	TUR79-2:62	44.4667	37.4167	1750	10.18730/6WFP8	Triticum aestivum subsp. aestivum	2	2	2	3
42271	TUR	LA	TUR79-2:62	44.4667	37.4167	1750	10.18730/6WFQ9	Triticum aestivum subsp. aestivum	2	2	2	3
42272	TUR	LA	TUR79-2:62	44.4667	37.4167	1750	10.18730/6WFRA	Triticum aestivum subsp. aestivum	2	2	2	3
42274	TUR	LA	TUR79-2:63	44.4	37.45	1850	10.18730/6WFTC	Triticum aestivum subsp. aestivum	2	2	2	3
42275	TUR	LA	TUR79-2:63	44.4	37.45	1850	10.18730/6WFVD	Triticum aestivum subsp. aestivum	2	2	1	3
42279	TUR	LA	TUR79-2:66	44.2333	37.5167	1900	10.18730/6WFZH	Triticum aestivum subsp. aestivum	1	2	3	5
42282	TUR	LA	TUR79-2:67	44.1	37.7833	1900	10.18730/6WG2M	Triticum aestivum subsp. aestivum	2	2	1	3
42283	TUR	LA	TUR79-2:67	44.1	37.7833	1900	10.18730/6WG3N	Triticum aestivum subsp. aestivum	2	2	1	3
42284	TUR	LA	TUR79-2:67	44.1	37.7833	1900	10.18730/6WG4P	Triticum aestivum subsp. aestivum	2	2	1	3
42288	TUR	LA	TUR79-2:68	44.0833	37.9833	1950	10.18730/6WG8T	Triticum aestivum subsp. aestivum	2	2	1	3
42291	TUR	LA	TUR79-2:68	44.0833	37.9833	1950	10.18730/6WGBX	Triticum aestivum subsp. aestivum	2	2	1	3
42293	TUR	LA	TUR79-2:68	44.0833	37.9833	1950	10.18730/6WGDZ	Triticum aestivum subsp. aestivum	2	3	4	3
42294	TUR	LA	TUR79-2:69	43.55	38.4167	1830	10.18730/6WGE*	Triticum aestivum subsp. aestivum	2	2	1	3
42297	TUR	LA	TUR79-2:69	43.55	38.4167	1830	10.18730/6WGH=	Triticum aestivum subsp. aestivum	2	3	4	3
42301	TUR	LA	TUR79-2:69	43.55	38.4167	1830	10.18730/6WGN2	Triticum aestivum subsp. aestivum	2	2	1	3
42308	TUR	LA	TUR79-2:70	43.5667	38.5833	1800	10.18730/6WGW9	Triticum aestivum subsp. aestivum	2	2	1	3
42309	TUR	LA	TUR79-2:70	43.5667	38.5833	1800	10.18730/6WGXA	Triticum aestivum subsp. aestivum	2	2	1	3
42310	TUR	LA	TUR79-2:76	42.5167	39.0333	1680	10.18730/6WGYB	Triticum aestivum subsp. aestivum	2	3	4	2
42312	TUR	LA	TUR79-2:79	42.8667	39.2333	1690	10.18730/6WH0D	Triticum aestivum subsp. aestivum	2	3	4	3
42313	TUR	LA	TUR79-2:79	42.8667	39.2333	1690	10.18730/6WH1E	Triticum aestivum subsp. aestivum	2	2	1	3
42314	TUR	LA	TUR79-2:80	42.7667	39.3333	1680	10.18730/6WH2F	Triticum aestivum subsp. aestivum	2	2	1	3
42315	TUR	LA	TUR79-2:80	42.7667	39.3333	1680	10.18730/6WH3G	Triticum aestivum subsp. aestivum	2	2	1	3
42318	TUR	LA	TUR79-2:80	42.7667	39.3333	1680	10.18730/6WH6K	Triticum aestivum subsp. aestivum	2	2	1	3
42319	TUR	LA	TUR79-2:80	42.7667	39.3333	1680	10.18730/6WH7M	Triticum aestivum subsp. aestivum	2	2	1	3
42322	TUR	LA	TUR79-2:82	44.0833	39.8333	1820	10.18730/6WHAQ	Triticum aestivum subsp. aestivum	2	2	1	3
42323	TUR	LA	TUR79-2:82	44.0833	39.8333	1820	10.18730/6WHBR	Triticum aestivum subsp. aestivum	2	2	2	3
42329	TUR	LA	TUR79-2:83	44.1333	39.7833	1920	10.18730/6WHHY	Triticum aestivum subsp. aestivum	2	2	2	3
42333	TUR	LA	TUR79-2:84	44.0167	39.5333	1650	10.18730/6WHN$	Triticum aestivum subsp. aestivum	2	3	4	3
42336	TUR	LA	TUR79-2:84	44.0167	39.5333	1650	10.18730/6WHR0	Triticum aestivum subsp. aestivum	2	3	4	2
42337	TUR	LA	TUR79-2:84	44.0167	39.5333	1650	10.18730/6WHS1	Triticum aestivum subsp. aestivum	2	3	4	2
42338	TUR	LA	TUR79-2:84	44.0167	39.5333	1650	10.18730/6WHT2	Triticum aestivum subsp. aestivum	2	3	4	3
42340	TUR	LA	TUR79-2:86	44.0833	39.7	1500	10.18730/6WHW4	Triticum aestivum subsp. aestivum	2	2	2	3
42342	TUR	LA	TUR79-2:90	42.8	40.5	1000	10.18730/6WHY6	Triticum aestivum subsp. aestivum	2	2	1	3
42346	TUR	LA	TUR79-2:94	42.8333	40.05	1300	10.18730/6WJ2A	Triticum aestivum subsp. aestivum	2	2	1	3
42347	TUR	LA	TUR79-2:94	42.8333	40.05	1300	10.18730/6WJ3B	Triticum aestivum subsp. aestivum	2	2	1	3
42357	TUR	LA	TUR79-2:97	42.6833	40.4167	1880	10.18730/6WJDN	Triticum aestivum subsp. aestivum	2	2	1	3
42359	TUR	LA	TUR79-2:97	42.6833	40.4167	1880	10.18730/6WJFQ	Triticum aestivum subsp. aestivum	2	2	2	3
42360	TUR	LA	TUR79-2:97	42.6833	40.4167	1880	10.18730/6WJGR	Triticum aestivum subsp. aestivum	2	2	2	3
42361	TUR	LA	TUR79-2:97	42.6833	40.4167	1880	10.18730/6WJHS	Triticum aestivum subsp. aestivum	2	2	2	3
42362	TUR	LA	TUR79-2:97	42.6833	40.4167	1880	10.18730/6WJJT	Triticum aestivum subsp. aestivum	2	2	2	3
42363	TUR	LA	TUR79-2:97	42.6833	40.4167	1880	10.18730/6WJKV	Triticum aestivum subsp. aestivum	2	2	2	3
42367	TUR	LA	TUR79-2:98	43.2833	40.7667	1590	10.18730/6WJQZ	Triticum aestivum subsp. aestivum	2	2	1	3
42369	TUR	LA	TUR79-2:98	43.2833	40.7667	1590	10.18730/6WJS~	Triticum aestivum subsp. aestivum	2	2	2	3
42371	TUR	LA	TUR79-2:98	43.2833	40.7667	1590	10.18730/6WJV=	Triticum aestivum subsp. aestivum	2	2	2	3
42372	TUR	LA	TUR79-2:98	43.2833	40.7667	1590	10.18730/6WJWU	Triticum aestivum subsp. aestivum	2	2	2	3
42373	TUR	LA	TUR79-2:98	43.2833	40.7667	1590	10.18730/6WJX0	Triticum aestivum subsp. aestivum	2	2	2	3
42376	TUR	LA	TUR79-2:99	43.2667	40.8833	1920	10.18730/6WK03	Triticum aestivum subsp. aestivum	2	2	2	3
42377	TUR	LA	TUR79-2:100	43.3	40.9667	1900	10.18730/6WK14	Triticum aestivum subsp. aestivum	1	2	1	5
42378	TUR	LA	TUR79-2:100	43.3	40.9667	1900	10.18730/6WK25	Triticum aestivum subsp. aestivum	2	2	2	3
42379	TUR	LA	TUR79-2:100	43.3	40.9667	1900	10.18730/6WK36	Triticum aestivum subsp. aestivum	2	2	2	3
42380	TUR	LA	TUR79-2:100	43.3	40.9667	1900	10.18730/6WK47	Triticum aestivum subsp. aestivum	2	2	2	3
42381	TUR	LA	TUR79-2:100	43.3	40.9667	1900	10.18730/6WK58	Triticum aestivum subsp. aestivum	2	2	2	3
42386	TUR	LA	TUR79-2:101	43.1333	41.1167	1900	10.18730/6WKAD	Triticum aestivum subsp. aestivum	1	1	3	4
42387	TUR	LA	TUR79-2:103	42.9167	41.1333	1800	10.18730/6WKBE	Triticum aestivum subsp. aestivum	2	3	4	3
42401	TUR	LA	TUR79-2:107	42.6167	40.9167	1880	10.18730/6WKSW	Triticum aestivum subsp. aestivum	2	2	2	3
42402	TUR	LA	TUR79-2:107	42.6167	40.9167	1880	10.18730/6WKTX	Triticum aestivum subsp. aestivum	2	2	2	3
42405	TUR	LA	TUR79-2:107	42.6167	40.9167	1880	10.18730/6WKX*	Triticum aestivum subsp. aestivum	2	2	2	3
42410	TUR	LA	TUR79-2:108	42.5	41.0833	1840	10.18730/6WM20	Triticum aestivum subsp. aestivum	2	2	2	3
42412	TUR	LA	TUR79-2:108	42.5	41.0833	1840	10.18730/6WM42	Triticum aestivum subsp. aestivum	1	2	1	5
42420	TUR	LA	TUR79-2:109	41.55	40.3167	1700	10.18730/6WMCA	Triticum aestivum subsp. aestivum	2	2	1	3
42422	TUR	LA	TUR79-2:109	41.55	40.3167	1700	10.18730/6WMEC	Triticum aestivum subsp. aestivum	2	2	2	3
42423	TUR	LA	TUR79-2:109	41.55	40.3167	1700	10.18730/6WMFD	Triticum aestivum subsp. aestivum	2	2	1	3
42434	TUR	LA	TUR79-2:110	41.4	40.1167	2010	10.18730/6WMTR	Triticum aestivum subsp. aestivum	1	2	2	3
42435	TUR	CV	TUR79-2:111	41.2833	39.9167	1950	10.18730/6WMVS	Triticum aestivum subsp. aestivum	1	2	1	5
42437	TUR	LA	TUR79-2:112	41.3333	40.0333	1810	10.18730/6WMXV	Triticum aestivum subsp. aestivum	2	2	1	3
42445	TUR	LA	TUR79-2:112	41.3333	40.0333	1810	10.18730/6WN5=	Triticum aestivum subsp. aestivum	2	2	1	3
42451	TUR	LA	TUR79-2:113	41.4333	40.1667	1620	10.18730/6WNB4	Triticum aestivum subsp. aestivum	2	2	1	3
42453	TUR	LA	TUR79-2:113	41.4333	40.1667	1620	10.18730/6WND6	Triticum aestivum subsp. aestivum	2	2	1	3
42460	TUR	LA	TUR79-2:114	42.2667	39.9667	1700	10.18730/6WNMD	Triticum aestivum subsp. aestivum	2	2	1	3
42464	TUR	LA	TUR79-2:115	42.3333	39.9167	1840	10.18730/6WNRH	Triticum aestivum subsp. aestivum	2	2	1	3
42468	TUR	LA	TUR79-2:116	42.3667	39.8833	2000	10.18730/6WNWN	Triticum aestivum subsp. aestivum	2	2	1	3
42471	TUR	LA	TUR79-2:116	42.3667	39.8833	2000	10.18730/6WNZR	Triticum aestivum subsp. aestivum	2	2	2	3
42484	TUR	LA	TUR79-2:121	41.8667	39.85	1620	10.18730/6WPC0	Triticum aestivum subsp. aestivum	2	2	1	3
42488	TUR	LA	TUR79-2:123	40.5667	40.2	1920	10.18730/6WPG4	Triticum aestivum subsp. aestivum	2	2	2	3
42501	TUR	LA	TUR79-2:124	40.4	39.7833	1420	10.18730/6WPXH	Triticum aestivum subsp. aestivum	2	2	1	3
42502	TUR	LA	TUR79-2:124	40.4	39.7833	1420	10.18730/6WPYJ	Triticum aestivum subsp. aestivum	2	2	1	3
42512	TUR	LA	TUR79-2:126	38.9667	39.9167	1670	10.18730/6WQ8W	Triticum aestivum subsp. aestivum	2	2	1	3
42521	TUR	LA	TUR79-2:128	38.6167	39.9333	1500	10.18730/6WQH0	Triticum aestivum subsp. aestivum	2	2	1	3
42524	TUR	LA	TUR79-2:129	38.3333	39.8667	1930	10.18730/6WQM3	Triticum aestivum subsp. aestivum	2	2	2	3
42536	TUR	LA	TUR79-2:130	38.2667	39.8333	1730	10.18730/6WR0F	Triticum aestivum subsp. aestivum	2	2	1	3
42540	TUR	LA	TUR79-2:130	38.2667	39.8333	1730	10.18730/6WR4K	Triticum aestivum subsp. aestivum	2	2	1	3
42541	TUR	LA	TUR79-2:130	38.2667	39.8333	1730	10.18730/6WR5M	Triticum aestivum subsp. aestivum	2	2	1	3
42551	TUR	LA	TUR79-2:131	37.0167	39.75	1300	10.18730/6WRFY	Triticum aestivum subsp. aestivum	2	2	1	3
42553	TUR	LA	TUR79-2:131	37.0167	39.75	1300	10.18730/6WRH*	Triticum aestivum subsp. aestivum	2	2	1	3
42555	TUR	LA	TUR79-2:132	36.7667	39.7667	1310	10.18730/6WRK$	Triticum aestivum subsp. aestivum	2	2	1	3
42556	TUR	LA	TUR79-2:132	36.7667	39.7667	1310	10.18730/6WRM=	Triticum aestivum subsp. aestivum	2	2	1	3
42558	TUR	LA	TUR79-2:132	36.7667	39.7667	1310	10.18730/6WRP0	Triticum aestivum subsp. aestivum	2	2	1	3
42562	TUR	LA	TUR79-2:133	35.3833	39.7	1100	10.18730/6WRT4	Triticum aestivum subsp. aestivum	2	2	1	3
42566	TUR	LA	TUR79-2:134	34.7167	39.75	1100	10.18730/6WRY8	Triticum aestivum subsp. aestivum	2	2	1	3
42569	TUR	LA	TUR79-2:98	43.2833	40.7667	1590	10.18730/6WS1B	Triticum aestivum subsp. aestivum	2	2	2	3
42574	TUR	LA	TUR79-2:125	39.5	39.75	1200	10.18730/6WS6G	Triticum aestivum subsp. aestivum	2	2	2	3
42575	TUR	LA	TUR79-2:125	39.5	39.75	1200	10.18730/6WS7H	Triticum aestivum subsp. aestivum	2	2	1	3
42576	TUR	LA	TUR79-2:125	39.5	39.75	1200	10.18730/6WS8J	Triticum aestivum subsp. aestivum	2	2	1	3
42579	TUR	LA	TUR79-2:101	43.1333	41.1167	1900	10.18730/6WSBN	Triticum aestivum subsp. aestivum	2	2	1	3
42585	MAR	LA	MAR85:18	-7.63333	29.8333	600	10.18730/6WSDQ	Triticum aestivum subsp. aestivum	1	1	3	4
42589	TUR	LA	TUR79-2:34	42.45	38.75	1880	10.18730/6WSHV	Triticum aestivum subsp. aestivum	2	2	4	3
42590	TUR	LA	TUR79-2:42	43.2167	38.95	1700	10.18730/6WSJW	Triticum aestivum subsp. aestivum	2	2	2	3
42591	TUR	LA	TUR79-2:42	43.2167	38.95	1700	10.18730/6WSKX	Triticum aestivum subsp. aestivum	2	2	2	3
42595	TUR	LA	TUR79-2:52	44.0167	38.1667	2250	10.18730/6WSQ~	Triticum aestivum subsp. aestivum	2	3	4	3
42691	SYR	LA	SYR88-2:19	36.9333	34.3083	920	10.18730/6WW94	Triticum aestivum subsp. aestivum	1	1	3	4
42692	SYR	LA	SYR88-2:27	36.0369	35.6681	60	10.18730/6WWA5	Triticum aestivum subsp. aestivum	1	2	1	5
42693	SYR	CV	SYR88-2:34	35.8292	35.6917	80	10.18730/6WWB6	Triticum aestivum subsp. aestivum	1	2	1	5
42695	SYR	LA	SYR88-2:37	35.91	35.88	310	10.18730/6WWD8	Triticum aestivum subsp. aestivum	1	2	1	5
42698	SYR	LA	SYR88-2:48	36.1333	35.3833	670	10.18730/6WWGB	Triticum aestivum subsp. aestivum	1	2	1	5
42704	SYR	LA	SYR88-4:10	39.2361	35.1556	550	10.18730/6WWMF	Triticum aestivum subsp. aestivum	1	1	3	4
42705	SYR	LA	SYR88-4:50	35.93	35.8133	465	10.18730/6WWNG	Triticum aestivum subsp. aestivum	1	2	1	5
42710	MAR	LA	MAR87-1:74	-5.36972	35.5747	100	10.18730/6WWTN	Triticum aestivum subsp. aestivum	1	2	1	5
42713	TUR	LA	TUR84-1:290	31.8667	41.0333	200	10.18730/6WWWQ	Triticum aestivum subsp. aestivum	2	2	1	3
42714	TUR	LA	TUR84-1:319	34.6606	41.8425	630	10.18730/6WWXR	Triticum aestivum subsp. aestivum	1	2	1	5
42717	TUR	LA	TUR84-1:319	34.6606	41.8425	630	10.18730/6WWZT	Triticum aestivum subsp. aestivum	1	2	1	5
42718	TUR	LA	TUR84-1:137	38.7433	37.7661	600	10.18730/6WX0V	Triticum aestivum subsp. aestivum	2	2	1	3
42719	TUR	LA	TUR84-1:137	38.7433	37.7661	600	10.18730/6WX1W	Triticum aestivum subsp. aestivum	2	2	1	5
42720	TUR	LA	TUR84-1:122	38.7833	37.2	600	10.18730/6WX2X	Triticum aestivum subsp. aestivum	1	2	1	5
42727	TUR	LA	TUR84-1:160	28.88	38.0442	385	10.18730/6WX9U	Triticum aestivum subsp. aestivum	2	2	1	3
42730	TUR	LA	TUR84-1:106	40.0625	38.3708	950	10.18730/6WXB1	Triticum aestivum subsp. aestivum	2	2	1	3
42734	TUR	LA	TUR84-1:318	34.7833	41.8833	600	10.18730/6WXF5	Triticum aestivum subsp. aestivum	1	2	1	5
42735	TUR	LA	TUR84-1:101	40.55	38.3333	1000	10.18730/6WXG6	Triticum aestivum subsp. aestivum	2	2	1	3
42738	TUR	LA	TUR84-1:19	29.6833	36.2333	500	10.18730/6WXK9	Triticum aestivum subsp. aestivum	1	2	1	5
42739	TUR	LA	TUR84-1:146	37.2333	37.2	1000	10.18730/6WXMA	Triticum aestivum subsp. aestivum	2	2	1	3
42740	TUR	LA	TUR84-1:146	37.2333	37.2	1000	10.18730/6WXNB	Triticum aestivum subsp. aestivum	2	2	1	5
42743	TUR	LA	TUR84-1:161	28.7061	38.2089	320	10.18730/6WXRE	Triticum aestivum subsp. aestivum	1	2	1	5
42745	TUR	LA	TUR84-1:1	27.6972	37.395	450	10.18730/6WXTG	Triticum aestivum subsp. aestivum	1	2	1	5
42750	TUR	LA	TUR84-1:142	37.4	37.5167	800	10.18730/6WXZN	Triticum aestivum subsp. aestivum	2	2	1	5
42751	TUR	LA	TUR84-1:142	37.4	37.5167	800	10.18730/6WY0P	Triticum aestivum subsp. aestivum	2	2	1	3
42754	TUR	LA	TUR84-1:93	40.0119	37.8967	800	10.18730/6WY2R	Triticum aestivum subsp. aestivum	1	2	1	5
42758	TUR	LA	TUR84-1:100	40.5042	38.2897	900	10.18730/6WY5V	Triticum aestivum subsp. aestivum	2	2	1	3
42759	TUR	LA	TUR84-1:100	40.5042	38.2897	900	10.18730/6WY6W	Triticum aestivum subsp. aestivum	1	2	1	5
42762	TUR	LA	TUR84-1:100	40.5042	38.2897	900	10.18730/6WY9Z	Triticum aestivum subsp. aestivum	2	2	1	3
42764	TUR	LA	TUR84-1:100	40.5042	38.2897	900	10.18730/6WYB~	Triticum aestivum subsp. aestivum	2	2	1	3
42766	TUR	LA	TUR84-1:100	40.5042	38.2897	900	10.18730/6WYD=	Triticum aestivum subsp. aestivum	2	2	1	3
42768	TUR	LA	TUR84-1:115	39.2053	36.8603	600	10.18730/6WYF0	Triticum aestivum subsp. aestivum	1	2	1	5
42769	TUR	LA	TUR84-1:55	36.19	36.5258	350	10.18730/6WYG1	Triticum aestivum subsp. aestivum	1	2	1	5
42773	TUR	LA	TUR84-1:20	30.215	36.3492	190	10.18730/6WYM5	Triticum aestivum subsp. aestivum	1	2	1	5
42781	TUR	LA	TUR84-1:59	35.9872	36.0333	320	10.18730/6WYWD	Triticum aestivum subsp. aestivum	1	2	1	5
42782	TUR	LA	TUR84-1:59	35.9872	36.0333	320	10.18730/6WYXE	Triticum aestivum subsp. aestivum	1	1	3	4
42783	TUR	LA	TUR84-1:60	35.995	35.9961	350	10.18730/6WYYF	Triticum aestivum subsp. aestivum	1	2	1	5
42784	TUR	LA	TUR84-1:60	35.995	35.9961	350	10.18730/6WYZG	Triticum aestivum subsp. aestivum	1	2	1	5
42787	TUR	LA	TUR84-1:80	37.8333	37.75	600	10.18730/6WZ2K	Triticum aestivum subsp. aestivum	2	2	1	3
42788	TUR	LA	TUR84-1:80	37.8333	37.75	600	10.18730/6WZ3M	Triticum aestivum subsp. aestivum	1	2	1	5
42789	TUR	LA	TUR84-1:80	37.8333	37.75	600	10.18730/6WZ4N	Triticum aestivum subsp. aestivum	2	2	1	3
42790	TUR	LA	TUR84-1:102	40.55	38.45	1000	10.18730/6WZ5P	Triticum aestivum subsp. aestivum	2	2	1	3
42791	TUR	LA	TUR84-1:102	40.55	38.45	1000	10.18730/6WZ6Q	Triticum aestivum subsp. aestivum	2	2	1	3
42792	TUR	LA	TUR84-1:103	40.2333	38.3833	925	10.18730/6WZ7R	Triticum aestivum subsp. aestivum	2	2	1	3
42793	TUR	LA	TUR84-1:103	40.2333	38.3833	925	10.18730/6WZ8S	Triticum aestivum subsp. aestivum	2	2	1	3
42794	TUR	LA	TUR84-1:103	40.2333	38.3833	925	10.18730/6WZ9T	Triticum aestivum subsp. aestivum	1	2	3	1
42797	TUR	LA	TUR84-1:105	40.0625	38.3708	950	10.18730/6WZCX	Triticum aestivum subsp. aestivum	2	2	1	3
42798	TUR	LA	TUR84-1:105	40.0625	38.3708	950	10.18730/6WZDY	Triticum aestivum subsp. aestivum	2	2	1	3
42799	TUR	LA	TUR84-1:107	39.8333	38.3	1100	10.18730/6WZEZ	Triticum aestivum subsp. aestivum	2	2	1	3
42803	TUR	LA	TUR84-1:136	38.9994	37.6817	500	10.18730/6WZJ=	Triticum aestivum subsp. aestivum	2	2	1	5
42805	TUR	LA	TUR84-1:567	44.5211	37.2692	1175	10.18730/6WZM0	Triticum aestivum subsp. aestivum	2	2	1	3
42806	TUR	LA	TUR84-1:567	44.5211	37.2692	1175	10.18730/6WZN1	Triticum aestivum subsp. aestivum	2	2	1	3
42811	TUR	LA	TUR84-1:567	44.5211	37.2692	1175	10.18730/6WZT6	Triticum aestivum subsp. aestivum	2	2	1	3
42812	TUR	LA	TUR84-1:567	44.5211	37.2692	1175	10.18730/6WZV7	Triticum aestivum subsp. aestivum	2	3	4	3
42813	TUR	LA	TUR84-1:143	37.35	37.5167	800	10.18730/6WZW8	Triticum aestivum subsp. aestivum	2	2	1	3
42815	TUR	LA	TUR84-1:143	37.35	37.5167	800	10.18730/6WZYA	Triticum aestivum subsp. aestivum	2	2	1	3
42818	TUR	LA	TUR84-1:150	28.8667	38.6333	490	10.18730/6X00C	Triticum aestivum subsp. aestivum	2	2	1	3
42821	TUR	LA	TUR84-1:316	34.9981	41.9186	50	10.18730/6X03F	Triticum aestivum subsp. aestivum	1	2	1	5
42822	TUR	LA	TUR84-1:316	34.9981	41.9186	50	10.18730/6X04G	Triticum aestivum subsp. aestivum	2	2	2	3
42824	TUR	LA	TUR84-1:320	34.6325	41.8639	460	10.18730/6X06J	Triticum aestivum subsp. aestivum	2	2	1	3
42825	TUR	LA	TUR84-1:320	34.6325	41.8639	460	10.18730/6X07K	Triticum aestivum subsp. aestivum	1	2	1	5
42830	TUR	LA	TUR84-1:325	35.0678	41.8547	50	10.18730/6X0CR	Triticum aestivum subsp. aestivum	1	2	1	5
42831	TUR	LA	TUR84-1:325	35.0678	41.8547	50	10.18730/6X0DS	Triticum aestivum subsp. aestivum	1	2	1	5
42832	TUR	LA	TUR84-1:332	32.6839	39.4667	1150	10.18730/6X0ET	Triticum aestivum subsp. aestivum	2	2	1	3
42837	TUR	LA	TUR84-1:580	42.5222	38.7633	1700	10.18730/6X0KZ	Triticum aestivum subsp. aestivum	1	2	3	4
42844	TUR	LA	TUR84-1:315	35.1	41.9833	50	10.18730/6X0T1	Triticum aestivum subsp. aestivum	1	2	1	5
42846	TUR	LA	TUR84-1:324	34.6694	41.5694	300	10.18730/6X0W3	Triticum aestivum subsp. aestivum	1	2	1	5
42847	TUR	LA	TUR84-1:324	34.6694	41.5694	300	10.18730/6X0X4	Triticum aestivum subsp. aestivum	1	2	1	5
42854	TUR	LA	TUR84-1:617	40.9333	40.3333	2025	10.18730/6X14B	Triticum aestivum subsp. aestivum	1	1	3	4
42855	TUR	LA	TUR84-1:626	42.4167	40.6833	1500	10.18730/6X15C	Triticum aestivum subsp. aestivum	1	2	3	5
42857	TUR	LA	TUR84-1:653	43.3075	40.7497	1725	10.18730/6X17E	Triticum aestivum subsp. aestivum	2	2	2	3
42858	TUR	LA	TUR84-1:653	43.3075	40.7497	1725	10.18730/6X18F	Triticum aestivum subsp. aestivum	2	2	2	3
42859	TUR	LA	TUR84-1:653	43.3075	40.7497	1725	10.18730/6X19G	Triticum aestivum subsp. aestivum	2	2	2	3
42864	TUR	LA	TUR84-1:613	41.0428	40.0469	1925	10.18730/6X1EN	Triticum aestivum subsp. aestivum	2	2	2	3
42865	TUR	LA	TUR84-1:613	41.0428	40.0469	1925	10.18730/6X1FP	Triticum aestivum subsp. aestivum	2	2	2	3
42866	TUR	LA	TUR84-1:613	41.0428	40.0469	1925	10.18730/6X1GQ	Triticum aestivum subsp. aestivum	2	2	2	3
42867	TUR	LA	TUR84-1:613	41.0428	40.0469	1925	10.18730/6X1HR	Triticum aestivum subsp. aestivum	2	2	2	3
42868	TUR	LA	TUR84-1:613	41.0428	40.0469	1925	10.18730/6X1JS	Triticum aestivum subsp. aestivum	1	2	1	5
42869	TUR	LA	TUR84-1:519	43.7	37.5667	2200	10.18730/6X1KT	Triticum aestivum subsp. aestivum	2	2	4	3
42871	TUR	LA	TUR84-1:516	43.7242	37.5775	2000	10.18730/6X1NW	Triticum aestivum subsp. aestivum	2	2	4	3
42872	TUR	LA	TUR84-1:516	43.7242	37.5775	2000	10.18730/6X1PX	Triticum aestivum subsp. aestivum	2	2	1	3
42873	TUR	LA	TUR84-1:659	43.0158	40.1792	1800	10.18730/6X1QY	Triticum aestivum subsp. aestivum	2	2	1	3
42874	TUR	LA	TUR84-1:659	43.0158	40.1792	1800	10.18730/6X1RZ	Triticum aestivum subsp. aestivum	2	2	1	3
42876	TUR	LA	TUR84-1:659	43.0158	40.1792	1800	10.18730/6X1T~	Triticum aestivum subsp. aestivum	2	2	1	3
42877	TUR	LA	TUR84-1:659	43.0158	40.1792	1800	10.18730/6X1V$	Triticum aestivum subsp. aestivum	2	2	1	3
42879	TUR	LA	TUR84-1:659	43.0158	40.1792	1800	10.18730/6X1XU	Triticum aestivum subsp. aestivum	2	2	1	3
42881	TUR	LA	TUR84-1:602	43.4667	39.6167	1800	10.18730/6X1Z1	Triticum aestivum subsp. aestivum	2	2	1	3
42882	TUR	LA	TUR84-1:602	43.4667	39.6167	1800	10.18730/6X202	Triticum aestivum subsp. aestivum	2	2	1	3
42883	TUR	LA	TUR84-1:602	43.4667	39.6167	1800	10.18730/6X213	Triticum aestivum subsp. aestivum	2	2	1	3
42886	TUR	LA	TUR84-1:624	41.7553	40.3183	2000	10.18730/6X246	Triticum aestivum subsp. aestivum	2	2	1	3
42895	TUR	LA	TUR84-1:674	42.8639	41.0342	1875	10.18730/6X2CE	Triticum aestivum subsp. aestivum	2	2	2	3
42896	TUR	LA	TUR84-1:674	42.8639	41.0342	1875	10.18730/6X2DF	Triticum aestivum subsp. aestivum	2	2	2	3
42897	TUR	LA	TUR84-1:674	42.8639	41.0342	1875	10.18730/6X2EG	Triticum aestivum subsp. aestivum	2	2	2	3
42899	TUR	LA	TUR84-1:507	42.25	38.7333	2240	10.18730/6X2GJ	Triticum aestivum subsp. aestivum	2	2	1	3
42900	TUR	LA	TUR84-1:507	42.25	38.7333	2240	10.18730/6X2HK	Triticum aestivum subsp. aestivum	2	2	1	3
42901	TUR	LA	TUR84-1:507	42.25	38.7333	2240	10.18730/6X2JM	Triticum aestivum subsp. aestivum	2	2	2	3
42902	TUR	LA	TUR84-1:512	42.3833	38.6	1700	10.18730/6X2KN	Triticum aestivum subsp. aestivum	2	2	2	3
42903	TUR	LA	TUR84-1:512	42.3833	38.6	1700	10.18730/6X2MP	Triticum aestivum subsp. aestivum	2	2	2	3
42904	TUR	LA	TUR84-1:512	42.3833	38.6	1700	10.18730/6X2NQ	Triticum aestivum subsp. aestivum	2	2	2	3
42905	TUR	LA	TUR84-1:512	42.3833	38.6	1700	10.18730/6X2PR	Triticum aestivum subsp. aestivum	2	2	1	3
42906	TUR	LA	TUR84-1:575	43.2131	39.0508	1700	10.18730/6X2QS	Triticum aestivum subsp. aestivum	2	3	4	3
42907	TUR	LA	TUR84-1:575	43.2131	39.0508	1700	10.18730/6X2RT	Triticum aestivum subsp. aestivum	2	3	4	3
42908	TUR	LA	TUR84-1:575	43.2131	39.0508	1700	10.18730/6X2SV	Triticum aestivum subsp. aestivum	2	2	2	3
42909	TUR	LA	TUR84-1:538	43.75	37.5667	1860	10.18730/6X2TW	Triticum aestivum subsp. aestivum	2	2	1	3
42911	TUR	LA	TUR84-1:511	42.4467	38.6347	1575	10.18730/6X2WY	Triticum aestivum subsp. aestivum	2	2	1	3
42914	TUR	LA	TUR84-1:511	42.4467	38.6347	1575	10.18730/6X2Z~	Triticum aestivum subsp. aestivum	2	2	1	3
42915	TUR	LA	TUR84-1:511	42.4467	38.6347	1575	10.18730/6X30$	Triticum aestivum subsp. aestivum	2	2	1	3
42916	TUR	LA	TUR84-1:578	42.5567	38.7706	1700	10.18730/6X31=	Triticum aestivum subsp. aestivum	2	3	4	3
42918	TUR	LA	TUR84-1:632	43.0214	40.7842	2150	10.18730/6X330	Triticum aestivum subsp. aestivum	2	2	2	3
42921	TUR	LA	TUR84-1:676	42.7167	41.1	1810	10.18730/6X352	Triticum aestivum subsp. aestivum	2	2	2	3
42922	TUR	LA	TUR84-1:634	43.1664	40.7972	1700	10.18730/6X363	Triticum aestivum subsp. aestivum	2	2	2	3
42928	TUR	LA	TUR84-1:677	42.65	41.1167	1780	10.18730/6X3C9	Triticum aestivum subsp. aestivum	2	2	2	3
42930	TUR	LA	TUR84-1:661	43.0492	40.1761	1460	10.18730/6X3EB	Triticum aestivum subsp. aestivum	2	2	2	3
42932	TUR	LA	TUR84-1:663	42.9992	40.1672	2050	10.18730/6X3GD	Triticum aestivum subsp. aestivum	2	2	2	3
42933	TUR	LA	TUR84-1:663	42.9992	40.1672	2050	10.18730/6X3HE	Triticum aestivum subsp. aestivum	2	2	2	3
42935	TUR	LA	TUR84-1:673	42.0831	40.815	2060	10.18730/6X3KG	Triticum aestivum subsp. aestivum	2	2	2	3
42936	TUR	LA	TUR84-1:673	42.0831	40.815	2060	10.18730/6X3MH	Triticum aestivum subsp. aestivum	2	2	2	3
42937	TUR	LA	TUR84-1:652	43.3167	40.8	1675	10.18730/6X3NJ	Triticum aestivum subsp. aestivum	2	2	2	3
42940	TUR	LA	TUR84-1:652	43.3167	40.8	1675	10.18730/6X3RN	Triticum aestivum subsp. aestivum	2	2	2	3
42941	TUR	LA	TUR84-1:652	43.3167	40.8	1675	10.18730/6X3SP	Triticum aestivum subsp. aestivum	2	2	2	3
42943	TUR	LA	TUR84-1:654	43.1369	40.6508	1800	10.18730/6X3VR	Triticum aestivum subsp. aestivum	2	2	2	3
42944	TUR	LA	TUR84-1:654	43.1369	40.6508	1800	10.18730/6X3WS	Triticum aestivum subsp. aestivum	2	2	2	3
42945	TUR	LA	TUR84-1:654	43.1369	40.6508	1800	10.18730/6X3XT	Triticum aestivum subsp. aestivum	2	2	2	3
42946	TUR	LA	TUR84-1:679	42.4167	41.2333	1610	10.18730/6X3YV	Triticum aestivum subsp. aestivum	2	2	2	3
42948	TUR	LA	TUR84-1:679	42.4167	41.2333	1610	10.18730/6X40X	Triticum aestivum subsp. aestivum	2	2	2	3
42949	TUR	LA	TUR84-1:640	43.2564	40.6142	1925	10.18730/6X41Y	Triticum aestivum subsp. aestivum	2	2	2	3
42950	TUR	LA	TUR84-1:640	43.2564	40.6142	1925	10.18730/6X42Z	Triticum aestivum subsp. aestivum	2	2	2	3
42952	TUR	LA	TUR84-1:651	43.15	41.1	1960	10.18730/6X44~	Triticum aestivum subsp. aestivum	2	2	2	3
42954	TUR	LA	TUR84-1:637	43.1333	40.6167	1760	10.18730/6X46=	Triticum aestivum subsp. aestivum	2	2	2	3
42956	TUR	LA	TUR84-1:672	42.7842	40.3933	1950	10.18730/6X480	Triticum aestivum subsp. aestivum	2	2	2	3
42957	TUR	LA	TUR84-1:672	42.7842	40.3933	1950	10.18730/6X491	Triticum aestivum subsp. aestivum	2	2	2	3
42958	TUR	LA	TUR84-1:656	43.1167	40.55	1760	10.18730/6X4A2	Triticum aestivum subsp. aestivum	2	2	2	3
42959	TUR	LA	TUR84-1:656	43.1167	40.55	1760	10.18730/6X4B3	Triticum aestivum subsp. aestivum	2	2	2	3
42960	TUR	LA	TUR84-1:656	43.1167	40.55	1760	10.18730/6X4C4	Triticum aestivum subsp. aestivum	2	2	2	3
42961	TUR	LA	TUR84-1:647	43.2833	40.9167	1950	10.18730/6X4D5	Triticum aestivum subsp. aestivum	2	2	1	3
42963	TUR	LA	TUR84-1:495	43.4667	38.5167	1860	10.18730/6X4F7	Triticum aestivum subsp. aestivum	2	2	1	3
42964	TUR	LA	TUR84-1:495	43.4667	38.5167	1860	10.18730/6X4G8	Triticum aestivum subsp. aestivum	2	2	1	3
42965	TUR	LA	TUR84-1:541	39.8389	37.7247	1850	10.18730/6X4H9	Triticum aestivum subsp. aestivum	2	2	2	3
42972	TUR	LA	TUR84-1:523	43.5617	37.6172	1875	10.18730/6X4MC	Triticum aestivum subsp. aestivum	2	2	1	3
42976	TUR	LA	TUR84-1:478	42.2667	38.5	1700	10.18730/6X4PE	Triticum aestivum subsp. aestivum	2	3	4	3
42977	TUR	LA	TUR84-1:478	42.2667	38.5	1700	10.18730/6X4QF	Triticum aestivum subsp. aestivum	2	3	4	3
42979	TUR	LA	TUR84-1:478	42.2667	38.5	1700	10.18730/6X4SH	Triticum aestivum subsp. aestivum	2	3	4	3
42981	TUR	LA	TUR84-1:454	39.3794	39.2844	1175	10.18730/6X4VK	Triticum aestivum subsp. aestivum	2	2	4	3
42985	TUR	LA	TUR84-1:479	42.2667	38.5	1700	10.18730/6X4ZQ	Triticum aestivum subsp. aestivum	2	3	4	3
42989	TUR	LA	TUR84-1:593	43.7522	39.0294	1875	10.18730/6X53V	Triticum aestivum subsp. aestivum	2	3	4	3
42992	TUR	LA	TUR84-1:513	42.2797	38.5608	1925	10.18730/6X56Y	Triticum aestivum subsp. aestivum	2	2	1	3
42993	TUR	LA	TUR84-1:513	42.2797	38.5608	1925	10.18730/6X57Z	Triticum aestivum subsp. aestivum	2	2	1	3
42997	TUR	LA	TUR84-1:505	43.3883	38.3386	1825	10.18730/6X5B=	Triticum aestivum subsp. aestivum	2	3	4	2
42999	TUR	LA	TUR84-1:591	42.3833	38.5833	1660	10.18730/6X5D0	Triticum aestivum subsp. aestivum	2	3	4	3
43004	TUR	LA	TUR84-1:497	43.745	38.6525	1875	10.18730/6X5J5	Triticum aestivum subsp. aestivum	2	3	4	3
43010	TUR	LA	TUR84-1:497	43.745	38.6525	1875	10.18730/6X5RB	Triticum aestivum subsp. aestivum	2	2	1	3
43011	TUR	LA	TUR84-1:497	43.745	38.6525	1875	10.18730/6X5SC	Triticum aestivum subsp. aestivum	2	2	1	3
43017	TUR	LA	TUR84-1:494	43.4	38.55	1875	10.18730/6X5ZJ	Triticum aestivum subsp. aestivum	2	3	4	3
43026	TUR	LA	TUR84-1:612	41.0372	40.0539	1975	10.18730/6X68V	Triticum aestivum subsp. aestivum	2	2	1	3
43030	TUR	LA	TUR84-1:606	42.5919	39.8092	2075	10.18730/6X6CZ	Triticum aestivum subsp. aestivum	2	2	1	3
43032	TUR	LA	TUR84-1:621	41.4	40.1167	1940	10.18730/6X6E~	Triticum aestivum subsp. aestivum	2	2	1	3
43034	TUR	LA	TUR84-1:610	40.9231	40.4242	1875	10.18730/6X6G=	Triticum aestivum subsp. aestivum	2	2	1	3
43035	TUR	LA	TUR84-1:610	40.9231	40.4242	1875	10.18730/6X6HU	Triticum aestivum subsp. aestivum	2	2	1	3
43036	TUR	LA	TUR84-1:604	42.8231	39.7036	1825	10.18730/6X6J0	Triticum aestivum subsp. aestivum	2	2	2	3
43037	TUR	LA	TUR84-1:604	42.8231	39.7036	1825	10.18730/6X6K1	Triticum aestivum subsp. aestivum	2	2	2	3
43038	TUR	LA	TUR84-1:604	42.8231	39.7036	1825	10.18730/6X6M2	Triticum aestivum subsp. aestivum	2	2	1	3
43059	TUR	LA	TUR84-1:557	34.0806	39.4181	1520	10.18730/6X78P	Triticum aestivum subsp. aestivum	2	2	2	3
43064	TUR	LA	TUR84-1:280	31.9153	41.2372	500	10.18730/6X7DV	Triticum aestivum subsp. aestivum	1	2	1	5
43068	TUR	LA	TUR84-1:278	31.5375	41.2775	60	10.18730/6X7HZ	Triticum aestivum subsp. aestivum	1	2	1	5
43069	TUR	LA	TUR84-1:310	34.8592	41.2086	300	10.18730/6X7J*	Triticum aestivum subsp. aestivum	1	2	3	5
43071	TUR	LA	TUR84-1:279	31.7167	41.25	220	10.18730/6X7M$	Triticum aestivum subsp. aestivum	1	2	1	5
43075	TUR	LA	TUR84-1:278	31.5375	41.2775	60	10.18730/6X7R1	Triticum aestivum subsp. aestivum	1	2	1	5
43082	TUR	LA	TUR84-1:245	29.6664	40.3286	370	10.18730/6X7Z8	Triticum aestivum subsp. aestivum	1	2	1	5
43087	TUR	LA	TUR84-1:293	34.0644	39.9683	820	10.18730/6X84D	Triticum aestivum subsp. aestivum	1	2	1	5
43089	TUR	LA	TUR84-1:221	27.4742	39.785	450	10.18730/6X86F	Triticum aestivum subsp. aestivum	1	2	1	5
43090	TUR	LA	TUR84-1:221	27.4742	39.785	450	10.18730/6X87G	Triticum aestivum subsp. aestivum	1	2	1	5
43093	TUR	LA	TUR84-1:221	27.4742	39.785	450	10.18730/6X8AK	Triticum aestivum subsp. aestivum	1	2	1	5
43097	TUR	LA	TUR84-1:577	42.6853	38.7894	1700	10.18730/6X8EQ	Triticum aestivum subsp. aestivum	2	2	1	3
43102	TUR	LA	TUR84-1:534	43.8833	37.6833	1500	10.18730/6X8KW	Triticum aestivum subsp. aestivum	2	2	2	3
43105	TUR	LA	TUR84-1:46	33.6667	36.2167	150	10.18730/6X8PZ	Triticum aestivum subsp. aestivum	1	2	1	5
43107	TUR	LA	TUR84-1:70	37.3525	37.1014	940	10.18730/6X8R~	Triticum aestivum subsp. aestivum	2	2	1	5
43109	TUR	LA	TUR84-1:84	38.7683	37.8658	850	10.18730/6X8T=	Triticum aestivum subsp. aestivum	2	2	1	3
43112	TUR	LA	TUR84-1:85	40.0119	37.8967	820	10.18730/6X8X1	Triticum aestivum subsp. aestivum	1	2	1	5
43114	TUR	LA	TUR84-1:85	40.0119	37.8967	820	10.18730/6X8Z3	Triticum aestivum subsp. aestivum	1	2	1	5
43116	TUR	LA	TUR84-1:85	40.0119	37.8967	820	10.18730/6X915	Triticum aestivum subsp. aestivum	2	2	1	3
43119	TUR	LA	TUR84-1:85	40.0119	37.8967	820	10.18730/6X948	Triticum aestivum subsp. aestivum	1	2	1	5
43122	TUR	LA	TUR84-1:96	40.4061	37.6508	825	10.18730/6X97B	Triticum aestivum subsp. aestivum	1	2	3	1
43123	TUR	LA	TUR84-1:96	40.4061	37.6508	825	10.18730/6X98C	Triticum aestivum subsp. aestivum	2	2	1	3
43124	TUR	LA	TUR84-1:96	40.4061	37.6508	825	10.18730/6X99D	Triticum aestivum subsp. aestivum	2	2	1	3
43125	TUR	LA	TUR84-1:99	40.45	38.1167	925	10.18730/6X9AE	Triticum aestivum subsp. aestivum	1	2	3	1
43127	TUR	LA	TUR84-1:271	30.0614	40.9678	270	10.18730/6X9CG	Triticum aestivum subsp. aestivum	1	2	1	5
43128	TUR	LA	TUR84-1:271	30.0614	40.9678	270	10.18730/6X9DH	Triticum aestivum subsp. aestivum	1	2	3	5
43129	TUR	LA	TUR84-1:271	30.0614	40.9678	270	10.18730/6X9EJ	Triticum aestivum subsp. aestivum	1	2	1	5
43131	TUR	LA	TUR84-1:425	35.7833	38.85	1225	10.18730/6X9GM	Triticum aestivum subsp. aestivum	2	2	1	3
43132	TUR	LA	TUR84-1:480	42.2833	38.5	1700	10.18730/6X9HN	Triticum aestivum subsp. aestivum	2	2	2	3
43133	TUR	LA	TUR84-1:482	42.3069	38.4667	1615	10.18730/6X9JP	Triticum aestivum subsp. aestivum	2	2	2	3
43134	TUR	LA	TUR84-1:509	42.2783	38.7025	2220	10.18730/6X9KQ	Triticum aestivum subsp. aestivum	2	2	1	3
43135	TUR	LA	TUR84-1:509	42.2783	38.7025	2220	10.18730/6X9MR	Triticum aestivum subsp. aestivum	2	2	1	3
43137	TUR	LA	TUR84-1:523	43.5617	37.6172	1875	10.18730/6X9PT	Triticum aestivum subsp. aestivum	2	2	4	3
43140	TUR	LA	TUR84-1:536	44.15	37.6667	1830	10.18730/6X9SX	Triticum aestivum subsp. aestivum	2	2	2	3
43141	TUR	LA	TUR84-1:536	44.15	37.6667	1830	10.18730/6X9TY	Triticum aestivum subsp. aestivum	2	2	2	3
43143	TUR	LA	TUR84-1:543	43.6461	37.2686	1910	10.18730/6X9W*	Triticum aestivum subsp. aestivum	2	2	2	3
43148	TUR	LA	TUR84-1:43	34.6333	36.8167	150	10.18730/6XA0U	Triticum aestivum subsp. aestivum	2	2	1	3
43149	TUR	LA	TUR84-1:570	43.3667	38.5333	1710	10.18730/6XA10	Triticum aestivum subsp. aestivum	2	3	4	3
43150	TUR	LA	TUR84-1:570	43.3667	38.5333	1710	10.18730/6XA21	Triticum aestivum subsp. aestivum	2	2	1	3
43155	TUR	LA	TUR84-1:635	43.1167	40.6667	1800	10.18730/6XA65	Triticum aestivum subsp. aestivum	2	2	2	3
43162	TUR	LA	TUR84-1:638	43.1333	40.6167	1760	10.18730/6XADC	Triticum aestivum subsp. aestivum	2	2	2	3
43163	TUR	LA	TUR84-1:638	43.1333	40.6167	1760	10.18730/6XAED	Triticum aestivum subsp. aestivum	2	2	2	3
43164	TUR	LA	TUR84-1:638	43.1333	40.6167	1760	10.18730/6XAFE	Triticum aestivum subsp. aestivum	2	2	2	3
43166	TUR	LA	TUR84-1:639	43.2028	40.6167	1860	10.18730/6XAHG	Triticum aestivum subsp. aestivum	2	2	2	3
43173	TUR	LA	TUR84-1:61	36.5719	36.2767	110	10.18730/6XARQ	Triticum aestivum subsp. aestivum	1	2	1	5
43176	TUR	LA	TUR84-1:61	36.5719	36.2767	110	10.18730/6XAVT	Triticum aestivum subsp. aestivum	1	2	1	5
43177	TUR	LA	TUR84-1:61	36.5719	36.2767	110	10.18730/6XAWV	Triticum aestivum subsp. aestivum	1	2	1	5
43178	PAK	LA	PAK86-2:1263	74.2914	35.4383	1010	10.18730/6XAXW	Triticum aestivum subsp. aestivum	1	1	3	4
43186	PAK	LA	PAK86-2:1269	74.64	35.6667	1300	10.18730/6XB3$	Triticum aestivum subsp. aestivum	2	3	4	2
43189	PAK	LA	PAK86-2:1272	74.43	35.88	1380	10.18730/6XB60	Triticum aestivum subsp. aestivum	2	3	4	2
43193	PAK	LA	PAK86-2:1277	73.7569	33.7719	2040	10.18730/6XBA4	Triticum aestivum subsp. aestivum	2	2	1	3
43200	PAK	LA	PAK86-2:1283	74.9158	35.6992	1740	10.18730/6XBHB	Triticum aestivum subsp. aestivum	2	3	4	2
43201	PAK	LA	PAK86-2:1287	75.5333	35.36	2020	10.18730/6XBJC	Triticum aestivum subsp. aestivum	2	3	4	2
43207	PAK	LA	PAK86-2:1295	75.6167	35.31	2160	10.18730/6XBRJ	Triticum aestivum subsp. aestivum	2	3	4	2
43211	PAK	LA	PAK86-2:1305	74.3333	35.98	1450	10.18730/6XBWP	Triticum aestivum subsp. aestivum	2	3	4	2
43221	PAK	LA	PAK86-2:1314	74.89	36.49	2450	10.18730/6XC6*	Triticum aestivum subsp. aestivum	2	3	4	2
43224	PAK	LA	PAK86-2:1318	74.1083	36.0556	1540	10.18730/6XC9=	Triticum aestivum subsp. aestivum	2	3	4	2
43225	PAK	LA	PAK86-2:1319	73.8833	36.12	1660	10.18730/6XCAU	Triticum aestivum subsp. aestivum	2	3	4	2
43231	PAK	LA	PAK86-2:1325	73.39	36.45	2260	10.18730/6XCF4	Triticum aestivum subsp. aestivum	2	3	4	2
43232	PAK	LA	PAK86-2:1327	73.48	36.22	1970	10.18730/6XCG5	Triticum aestivum subsp. aestivum	2	3	4	2
43236	PAK	LA	PAK86-2:1330	73.77	36.1833	1710	10.18730/6XCM9	Triticum aestivum subsp. aestivum	1	2	1	5
43237	PAK	LA	PAK86-2:1266	74.3333	35.92	1400	10.18730/6XCNA	Triticum aestivum subsp. aestivum	2	3	4	2
43238	PAK	LA	PAK86-1:1207	66.91	30.24	1680	10.18730/6XCPB	Triticum aestivum subsp. aestivum	2	3	4	2
43240	PAK	LA	PAK86-1:1210	66.82	29.6833	1860	10.18730/6XCRD	Triticum aestivum subsp. aestivum	2	3	4	2
43241	PAK	LA	PAK86-1:1211	66.95	29.9667	1780	10.18730/6XCSE	Triticum aestivum subsp. aestivum	2	3	4	2
43242	PAK	LA	PAK86-1:1211	66.95	29.9667	1780	10.18730/6XCTF	Triticum aestivum subsp. aestivum	2	3	4	2
43245	PAK	LA	PAK86-1:1221	66.9814	30.15	1610	10.18730/6XCXJ	Triticum aestivum subsp. aestivum	2	3	4	2
43247	PAK	LA	PAK86-1:1221	66.9814	30.15	1610	10.18730/6XCZM	Triticum aestivum subsp. aestivum	2	3	4	2
43248	PAK	LA	PAK86-1:1222	67.38	30.0333	1540	10.18730/6XD0N	Triticum aestivum subsp. aestivum	2	3	4	2
43250	PAK	LA	PAK86-1:1223	67.15	30.0833	1870	10.18730/6XD2Q	Triticum aestivum subsp. aestivum	2	3	4	2
43254	PAK	LA	PAK86-1:1225	66.9	30.3	1400	10.18730/6XD6V	Triticum aestivum subsp. aestivum	2	3	4	2
43256	PAK	LA	PAK86-1:1227	66.9333	30.5	1340	10.18730/6XD8X	Triticum aestivum subsp. aestivum	1	1	3	4
43257	PAK	LA	PAK86-1:1228	66.8583	30.57	1290	10.18730/6XD9Y	Triticum aestivum subsp. aestivum	2	3	4	2
43272	PAK	LA	PAK86-1:1261	68.5333	30.32	1380	10.18730/6XDR8	Triticum aestivum subsp. aestivum	2	3	4	2
43313	OMN	LA	OMN87:110	57.0519	23.1883	700	10.18730/6XF1C	Triticum aestivum subsp. aestivum	2	3	4	2
43320	OMN	LA	OMN87:117	57.6589	23.0661	1600	10.18730/6XF8K	Triticum aestivum subsp. aestivum	2	3	4	2
43325	OMN	LA	OMN87:132	56.1867	26.1067	1200	10.18730/6XFDR	Triticum aestivum subsp. aestivum	2	2	1	3
43328	OMN	LA	OMN87:133	55.91	24.5181	400	10.18730/6XFGV	Triticum aestivum subsp. aestivum	1	1	3	4
43334	PAK	LA	PAK86-2:1321	73.3667	36.32	2200	10.18730/6XFP~	Triticum aestivum subsp. aestivum	2	2	1	3
43344	TUR	LA	TUR89-1:62901	26.4647	41.7711	190	10.18730/6XFX3	Triticum aestivum subsp. aestivum	1	2	1	5
43346	EGY	LA	EGY89:22	29.5333	30.9	15	10.18730/6XFZ5	Triticum aestivum subsp. aestivum	1	1	3	4
43351	DZA	LA	DZA89-A:4	7.48333	36.4833	300	10.18730/6XG28	Triticum aestivum subsp. aestivum	1	2	1	5
43363	DZA	LA	DZA89-A:23	5.37556	35.5094	750	10.18730/6XG4A	Triticum aestivum subsp. aestivum	1	2	1	5
43365	DZA	LA	DZA89-A:35	3.23	34.7347	1060	10.18730/6XG6C	Triticum aestivum subsp. aestivum	1	2	1	5
43367	DZA	CV	DZA89-B:1	3.85556	36.8983	60	10.18730/6XG8E	Triticum aestivum subsp. aestivum	1	1	3	4
43368	DZA	CV	DZA89-B:3	6.58333	36.2167	620	10.18730/6XG9F	Triticum aestivum subsp. aestivum	1	1	3	4
43371	DZA	CV	DZA89-B:6	7.01667	36.3667	660	10.18730/6XGBH	Triticum aestivum subsp. aestivum	1	2	1	5
43372	DZA	CV	DZA89-B:10	7.55	36.4333	295	10.18730/6XGCJ	Triticum aestivum subsp. aestivum	1	2	3	5
43374	DZA	CV	DZA89-B:16	7.96667	36.2667	590	10.18730/6XGDK	Triticum aestivum subsp. aestivum	1	2	1	5
43375	DZA	CV	DZA89-B:17	8.05	36.1167	795	10.18730/6XGEM	Triticum aestivum subsp. aestivum	1	2	1	5
43376	DZA	CV	DZA89-B:18	8.05	36.1	790	10.18730/6XGFN	Triticum aestivum subsp. aestivum	1	1	3	4
43377	DZA	CV	DZA89-B:18	8.05	36.1	790	10.18730/6XGGP	Triticum aestivum subsp. aestivum	1	2	3	5
43378	DZA	LA	DZA89-B:21	8.11667	36.05	580	10.18730/6XGHQ	Triticum aestivum subsp. aestivum	1	2	1	5
43379	DZA	LA	DZA89-B:30	6.71667	35.5167	940	10.18730/6XGJR	Triticum aestivum subsp. aestivum	1	1	3	4
43380	DZA	LA	DZA89-B:30	6.71667	35.5167	940	10.18730/6XGKS	Triticum aestivum subsp. aestivum	1	2	1	5
43381	DZA	LA	DZA89-B:42	4.46889	35.0853	830	10.18730/6XGMT	Triticum aestivum subsp. aestivum	1	1	3	4
43382	DZA	LA	DZA89-B:46	4.18333	34.85	950	10.18730/6XGNV	Triticum aestivum subsp. aestivum	1	2	1	5
43383	DZA	LA	DZA89-B:50	3.55472	34.8039	960	10.18730/6XGPW	Triticum aestivum subsp. aestivum	1	2	1	5
43386	DZA	CV	DZA89-B:55	3.65333	36.2192	680	10.18730/6XGRY	Triticum aestivum subsp. aestivum	1	2	1	5
43391	DZA	LA	DZA89-B:65	3.61667	36.7167	50	10.18730/6XGX=	Triticum aestivum subsp. aestivum	1	2	1	5
43413	UKR	CV	UKR::15	30.7	46.4833		10.18730/6XHKM	Triticum aestivum subsp. aestivum	2	2	1	5
43416	RUS	CV	RUS::A11	73.4167	54.9667		10.18730/6XHPQ	Triticum aestivum subsp. aestivum	1	2	1	5
43429	RUS	CV	RUS::E38	46.0333	51.5333		10.18730/6XJ3U	Triticum aestivum subsp. aestivum	1	2	1	5
43435	UKR	CV	UKR::10	30.5167	50.4333		10.18730/6XJ95	Triticum aestivum subsp. aestivum	1	2	1	5
43461	IND		IND::23	76.0833	29.5833		10.18730/6XK3Z	Triticum aestivum subsp. aestivum	2	3	4	2
43464	UKR	CV	UKR::10	30.5167	50.4333		10.18730/6XK6$	Triticum aestivum subsp. aestivum	1	2	1	5
43467	RUS	CV	RUS::E38	46.0333	51.5333		10.18730/6XK90	Triticum aestivum subsp. aestivum	1	2	1	5
43486	RUS	CV	RUS::E22	38.9833	45.0333		10.18730/6XKWK	Triticum aestivum subsp. aestivum	1	2	1	5
43497	RUS	CV	RUS::E38	46.0333	51.5333		10.18730/6XM7Y	Triticum aestivum subsp. aestivum	1	2	1	5
43505	RUS	CV	RUS::E22	38.9833	45.0333		10.18730/6XMF1	Triticum aestivum subsp. aestivum	1	1	3	4
43513	RUS	CV	RUS::E23	50	53		10.18730/6XMQ9	Triticum aestivum subsp. aestivum	1	2	1	5
43516	RUS	CV	RUS::A10	82.9333	55.0333		10.18730/6XMTC	Triticum aestivum subsp. aestivum	1	2	1	5
43550	KAZ	UM	KAZ::2	76.9167	43.2833		10.18730/6XNW9	Triticum aestivum subsp. aestivum	1	2	1	5
43562	KAZ	UM	KAZ::2	76.9167	43.2833		10.18730/6XP8N	Triticum aestivum subsp. aestivum	1	2	1	5
43563	KAZ	UM	KAZ::2	76.9167	43.2833		10.18730/6XP9P	Triticum aestivum subsp. aestivum	1	2	1	5
43585	RUS	CV	RUS::E41	41.95	45.05		10.18730/6XPZ7	Triticum aestivum subsp. aestivum	1	2	1	5
43597	DZA	LA	DZA90:28	-1.32806	34.6044	855	10.18730/6XQ7F	Triticum aestivum subsp. aestivum	1	2	1	5
43605	SYR		SY 101	35.85	35.65	100	10.18730/6XQFQ	Triticum aestivum subsp. aestivum	1	2	1	5
43610	SYR		SY 677	35.95	35.9167	465	10.18730/6XQMW	Triticum aestivum subsp. aestivum	1	1	3	4
43611	SYR		SY 741	40.3	35.25	230	10.18730/6XQNX	Triticum aestivum subsp. aestivum	2	3	4	2
43647	TUR	UM	TUR79-2:69	43.55	38.4167	1830	10.18730/6XRSW	Triticum aestivum subsp. aestivum	2	2	2	3
43806	IRN	LA	IRN-S206	47.1167	38.4167		10.18730/6XXCV	Triticum aestivum subsp. aestivum	2	2	2	3
43812	SRB	LA	SCG-S189	19.69	43.36		10.18730/6XXJ~	Triticum aestivum subsp. aestivum	1	2	1	5
43904	SYR	LA	SYR90-2:17	36.1333	35.6667	900	10.18730/6Y0CC	Triticum aestivum subsp. aestivum	2	2	1	3
44054	TUR	UM	TUR48::296	44.5833	37.3		10.18730/6Y52E	Triticum aestivum subsp. aestivum	2	3	4	3
44154	MKD	LA	MKD-S281	20.9833	42.0167		10.18730/6Y852	Triticum aestivum subsp. aestivum	2	2	1	3
44173	TUR		TUR::29	43.0667	40.6		10.18730/6Y8RN	Triticum aestivum subsp. aestivum	2	2	1	3
44174	TUR		TUR::66	41.2833	39.9		10.18730/6Y8SP	Triticum aestivum subsp. aestivum	2	3	4	3
44175	TUR		TUR::66	41.2833	39.9		10.18730/6Y8TQ	Triticum aestivum subsp. aestivum	2	2	1	3
44179	TUR		TUR::1	43.0667	39.7167		10.18730/6Y8XT	Triticum aestivum subsp. aestivum	2	2	1	3
44181	TUR		TUR::66	41.2833	39.9		10.18730/6Y8ZW	Triticum aestivum subsp. aestivum	2	2	1	3
44198	JOR	LA	JOR91:21	35.5833	32.1667	-260	10.18730/6Y9G8	Triticum aestivum subsp. aestivum	2	2	4	2
44199	JOR	LA	JOR91:23	35.65	32.4833	300	10.18730/6Y9H9	Triticum aestivum subsp. aestivum	1	2	1	5
44204	JOR	LA	JOR91:39	35.7056	31.9394	480	10.18730/6Y9PE	Triticum aestivum subsp. aestivum	2	2	1	5
44210	UZB	LA	SUN91:32	67.9283	40.0958	350	10.18730/6Y9VK	Triticum aestivum subsp. aestivum	2	3	4	2
44211	UZB	LA	SUN91:36	67.4167	39.9667	730	10.18730/6Y9WM	Triticum aestivum subsp. aestivum	2	3	4	2
44217	TUN	LA	TUN90-2:2	10.45	36.1833		10.18730/6YA2T	Triticum aestivum subsp. aestivum	1	2	3	1
44222	TUN	LA	TUN90-2:15	8.67778	34.5428	360	10.18730/6YA7Z	Triticum aestivum subsp. aestivum	1	2	1	5
44225	TUN	LA	TUN90-2:17	9.06667	36.4833		10.18730/6YAA$	Triticum aestivum subsp. aestivum	1	1	3	4
44226	TUN	LA	TUN90-2:19	9.58333	37.0667		10.18730/6YAB=	Triticum aestivum subsp. aestivum	1	1	3	4
44228	TUN	LA	TUN90-2:21	9.7	37.0333		10.18730/6YAD0	Triticum aestivum subsp. aestivum	1	1	3	4
44230	TUN	LA	TUN90-2:21	9.7	37.0333		10.18730/6YAF2	Triticum aestivum subsp. aestivum	1	2	3	5
44232	TUN	LA	TUN90-2:21	9.7	37.0333		10.18730/6YAH4	Triticum aestivum subsp. aestivum	1	1	3	4
44233	TUN	LA	TUN90-2:21	9.7	37.0333		10.18730/6YAJ5	Triticum aestivum subsp. aestivum	1	1	3	4
44234	TUN	LA	TUN90-2:22	10.05	37.0167		10.18730/6YAK6	Triticum aestivum subsp. aestivum	1	2	3	5
44240	TUN	LA	TUN90-2:28	9.38333	33.75		10.18730/6YASC	Triticum aestivum subsp. aestivum	1	2	3	1
44242	TUN	LA	TUN90-2:28	9.38333	33.75		10.18730/6YAVE	Triticum aestivum subsp. aestivum	1	2	3	5
44246	TUN	LA	TUN90-2:28	9.38333	33.75		10.18730/6YAZJ	Triticum aestivum subsp. aestivum	1	2	3	5
44247	TUN	LA	TUN90-2:28	9.38333	33.75		10.18730/6YB0K	Triticum aestivum subsp. aestivum	1	2	3	5
44251	TUN	LA	TUN90-2:28	9.38333	33.75		10.18730/6YB4Q	Triticum aestivum subsp. aestivum	2	2	1	5
44252	TUN	LA	TUN90-2:29	9.48333	33.7833		10.18730/6YB5R	Triticum aestivum subsp. aestivum	2	2	1	3
44254	TUN	LA	TUN90-2:29	9.48333	33.7833		10.18730/6YB7T	Triticum aestivum subsp. aestivum	1	2	3	5
44264	TUN	LA	TUN90-2:32	11.0333	33.6167		10.18730/6YBHU	Triticum aestivum subsp. aestivum	2	2	1	5
44271	TUN	LA	TUN90-2:40	10.7	34.6833		10.18730/6YBR6	Triticum aestivum subsp. aestivum	2	2	1	5
44277	TUN	LA	TUN90-2:42	10.6361	35.8139		10.18730/6YBYC	Triticum aestivum subsp. aestivum	1	2	1	5
44280	TUN	LA	TUN90-2:45	8.81667	35.9667		10.18730/6YC1F	Triticum aestivum subsp. aestivum	1	2	3	1
44285	TUN	LA	TUN90-2:47	9.08333	35.55		10.18730/6YC6M	Triticum aestivum subsp. aestivum	1	2	3	1
44290	TUN	LA	TUN90-2:52	9.19694	35.4589	550	10.18730/6YCBS	Triticum aestivum subsp. aestivum	1	2	1	5
44293	TUN	LA	TUN90-2:52	9.19694	35.4589	550	10.18730/6YCEW	Triticum aestivum subsp. aestivum	1	1	3	4
44294	TUN	LA	TUN90-2:54	8.56667	35.8833		10.18730/6YCFX	Triticum aestivum subsp. aestivum	1	2	3	5
44295	TUN	LA	TUN90-2:54	8.56667	35.8833		10.18730/6YCGY	Triticum aestivum subsp. aestivum	1	2	3	5
44518	ARM	LA	ARM92:8	44.78	39.8339	1050	10.18730/6YKFZ	Triticum aestivum subsp. aestivum	2	3	4	3
44520	ARM	LA	ARM92:8	44.78	39.8339	1050	10.18730/6YKH~	Triticum aestivum subsp. aestivum	2	3	4	2
44521	ARM	LA	ARM92:8	44.78	39.8339	1050	10.18730/6YKJ$	Triticum aestivum subsp. aestivum	2	3	4	2
44526	ETH	LA	ETH-S918	39.5167	13.0667	2713	10.18730/6YKQ2	Triticum aestivum subsp. aestivum	1	2	3	5
44529	ERI	LA	ERI-S779	38.8333	14.5833	2000	10.18730/6YKT5	Triticum aestivum subsp. aestivum	2	2	1	3
44533	ETH	LA	ETH-S906	38.71	9.75	2820	10.18730/6YKY9	Triticum aestivum subsp. aestivum	1	2	1	5
44537	ETH	LA	ETH-S906	38.71	9.75	2820	10.18730/6YM2D	Triticum aestivum subsp. aestivum	2	2	1	3
44549	ETH	LA	ETH-S925	38.8333	4.8	1550	10.18730/6YMES	Triticum aestivum subsp. aestivum	2	2	1	3
44709	IRN	LA	IRN93-2:30	45.5281	38.4819	980	10.18730/6YSE0	Triticum aestivum subsp. aestivum	2	3	4	2
